# Supplementary material for: Biosynthesis of trioxacarcin revealing a different starter unit and complex tailoring steps for type II polyketide synthase
Source: PubMed Central journal article supplement — Chem Sci. 2015 Apr 7;6(6):3440–7. doi: 10.1039/c5sc00116a (PMC5659172; doi:10.1039/c5sc00116a), 2015-04-07

## Supporting Information

### General.

Agents and chemicals were purchased from Sigma-Aldrich or TCI (shanghai). Dried dichloride methane ( $\text{CH}_2\text{Cl}_2$ ) was obtained by distilling from calcium hydride and stored under argon atmosphere. Reagents were purchased commercially and used without further purification. All reactions were monitored by thin layer chromatography (TLC) with silica gel coated plates, UV light as visualizing agent or basic aqueous potassium permanganate as developing agent. NMR spectra were recorded on Agilent 500/54/ASP instrument and calibrated using residual protonated solvent ( $\delta_{\text{H}} = 7.26$  and  $\delta_{\text{C}} = 77.16$  for  $\text{CDCl}_3$ ,  $\delta_{\text{H}} = 3.31$  and  $\delta_{\text{C}} = 49.15$  for  $\text{CD}_3\text{OD}$ ,  $\delta_{\text{H}} = 2.50$  and  $\delta_{\text{C}} = 39.51$  for DMSO- $d_6$ ) as an internal reference. Data for  $^1\text{H}$  NMR are recorded as follows: chemical shift ( $\delta$ , ppm), multiplicity (s = singlet, d = doublet, t = triplet, m = multiplet or unresolved. Coupling constants (J) are reported in Hertz. Mass spectra were recorded by ESI-MS.

A TXN producer, *Streptomyces bottropensis* NRRL 12051 was purchased from American Agricultural Research Service (ARS). *Escherichia coli* DH5 $\alpha$  competent cells were used for routine subcloning and plasmid preparations and it were grown in LB medium with appropriate antibiotics. pCC1FOS<sup>TM</sup> Vector (Epicentre) was used for fosmid library preparations. PCR amplification was carried out using either *Taq* DNA polymerase or PfuUltra<sup>TM</sup> DNA polymerase with genomic DNA or fosmid pTG5001, pTG5002, or pTG5003 as a template, degenerate or specific primers were listed in Table S1/S2. Primer synthesis was performed at Invitrogen Shanghai Center. DNA sequencing was performed at the Shanghai Majorbio Pharm Technology Co., Ltd. The general genetic manipulations of *S. bottropensis*, production and analysis of TXN were performed as following described methods.

### Sequence Analysis.

The open reading frames (ORFs) were deduced from the sequence by performing Frame Plot 4.0 beta program (<http://nocardia.nih.gov/fp4>) and BLAST methods. Amino acid sequence alignments were performed by the CLUSTALW method from BIOLOGYWORKBENCH 3.2 software (<http://workbench.sdsc.edu>).

### **Production and Analysis of Trioxacarcin (TXN).**

*S. bottropensis* NRRL 12051 WT and recombinant strains were grown in a seed culture of TSB (tryptic soy broth) (3%) at 30 °C for 36 hr, then 5 mL of seeding culture suspension was transferred into a 500-mL flask containing 100 mL fermentation broth (soluble starch 6%, glucose 1%, yeast extract 1%, NaCl 0.3%, MgSO<sub>4</sub>·7H<sub>2</sub>O 0.1%, KH<sub>2</sub>PO<sub>4</sub> 0.1%, CuSO<sub>4</sub>·5H<sub>2</sub>O 7 mg, FeSO<sub>4</sub>·7H<sub>2</sub>O 1 mg, MnCl<sub>2</sub>·4H<sub>2</sub>O 0.8 mg, ZnSO<sub>4</sub>·7H<sub>2</sub>O 0.2 mg, CoCl<sub>2</sub>·7H<sub>2</sub>O 0.0006 mg, HP20, 5%) and incubated at 30 °C for 5d. The culture broth was centrifugalized (5000 rpm for 10 min), the culture filtrates were removed, and all the mycelia were collected including macro resin HP20 followed by acetone soaking and ultrasonic broking. The organic layer was evaporated under reduced pressure, and the water layer was extracted thrice with equal volume of ethyl acetate. Combined extract was finally concentrated to 2 mL. HPLC analysis was carried out on a Kromasil 100-C18 column (5 $\mu$ , 4.6 $\times$ 250 mm). The column was equilibrated with 50% solvents A (H<sub>2</sub>O and 0.1% HCOOH) and B (CH<sub>3</sub>CN and 0.1% HCOOH) and developed with the following program: 0–5 min, 10% B; 5-25 min, a linear gradient from 10% B to 90% B; 25–27 min constant 90% B; 27-29 min with a linear gradient from 90% B to 10% B; 29-30min constant 10% B. This process was carried out at a flow rate of 1 mL/min and UV detection at 271 nm using an Agilent 1100 HPLC system. The identity of compound was confirmed by liquid chromatography/MS (LC-MS) analysis performed on a Thermo Scientific LCQ FLEET system under the same conditions. TXN-A showed [M+Na]<sup>+</sup> ion at m/z = 899.2, consistent with the molecular formula C<sub>42</sub>H<sub>52</sub>O<sub>20</sub>, and HRMS (m/z): [M+Na]<sup>+</sup> calcd. 899.2944, found 899.2945.

### **Precursors Feeding and Isolation of TXN-A.**

The fermentation was carried out as mentioned above, equal portions of <sup>13</sup>C-labeled precursor (a total of 0.7 g/L) was added to a fermentation culture by pulse feeding after 48, 56, 64, 72, 80, 88 hr of incubation. The crude extract was subjected to flash chromatography on silica gel with MeOH/CH<sub>2</sub>Cl<sub>2</sub> gradient (0-10% MeOH in CH<sub>2</sub>Cl<sub>2</sub>). The eluent washed with MeOH/CH<sub>2</sub>Cl<sub>2</sub> (2:100, and 3:100, v/v) was collected, and it was further analyzed by gel filtration chromatography (MeOH/CHCl<sub>3</sub>, 1:1 v/v). The residues with green fluorescent fraction was collected and detected with TLC (MeOH/CHCl<sub>3</sub>, 1:15, R<sub>f</sub>= 0.6), collected and evaporated to give a yellow compound

TXN-A, this yellow compound in <sup>1</sup>H-NMR (500 MHz, CDCl<sub>3</sub>) and <sup>13</sup>C-NMR (125 MHz, CDCl<sub>3</sub>) was the same as that reported in ref.1. The cultures feeding with each isotope-labeled precursor were extracted and treated as described above, and the pure labeled TXN was isolated and spectral-analyzed by <sup>13</sup>C-NMR (125 MHz, CDCl<sub>3</sub>) (Fig. S1, Table S3). <sup>13</sup>C<sub>6</sub>-L-Ile (a total of 0.35 g/L) was fed in to the fermentation cultures in the same way, and the labeled product was also analyzed by LC-MS and <sup>13</sup>C NMR (125 MHz, CDCl<sub>3</sub>).

### **Construction of Gene Replacement and Complementation Mutants.**

The gene replacement mutants of *orf-3*, *orf-1*, *orf+3*, *orf+11*, *txnA<sub>1</sub>*, *txnA<sub>4</sub>*, *txnRg<sub>1</sub>*, *txnRg<sub>6</sub>*, *txnC<sub>2</sub>*, *txnC<sub>3</sub>*, *txnC<sub>4</sub>*, *txnO<sub>2</sub>*, *txnO<sub>5</sub>*, *txnO<sub>6</sub>*, *txnO<sub>12</sub>*, and *txnB<sub>4</sub>*, were constructed using REDIRECT Technology similar to those previously published<sup>2</sup>. The internal region of each target gene was replaced by a apramycin resistance gene *aac(3)IV*, *oriT* (RK2) and was amplified with the following primers respectively: Orf-3-F/R, Orf-1-F/R, Orf+3-F/R, Orf+11-F/R, TxnA1-F/R, TxnA4-F/R, TxnRg<sub>1</sub>-F/R, TxnRg<sub>6</sub>-F/R, TxnC2-F/R, TxnC3-F/R, TxnC4-F/R, TxnO2-F/R, TxnO5-F/R, TxnO6-F/R, TxnO12-F/R, and TxnB4-F/R (Table S3), the PCR template were fosmids of pTG5001, pTG5002 and pTG5003. Mutant fosmids  $\Delta$ *orf-3*,  $\Delta$ *orf-1*,  $\Delta$ *orf+3*,  $\Delta$ *orf+11*,  $\Delta$ *txnA<sub>1</sub>*,  $\Delta$ *txnA<sub>4</sub>*,  $\Delta$ *txnRg<sub>1</sub>*,  $\Delta$ *txnRg<sub>6</sub>*,  $\Delta$ *txnC<sub>2</sub>*,  $\Delta$ *txnC<sub>3</sub>*,  $\Delta$ *txnC<sub>4</sub>*,  $\Delta$ *txnO<sub>2</sub>*,  $\Delta$ *txnO<sub>5</sub>*,  $\Delta$ *txnO<sub>6</sub>*,  $\Delta$ *txnO<sub>12</sub>*, and  $\Delta$ *txnB<sub>4</sub>* for gene replacement were constructed and introduced into *S.bottropensis* NRRL 12051 by conjugation from *E. coli* S17-1. The double crossover mutants (TG5002, TG5003, TG5006, TG5005, TG5001, TG5008, TG5004, TG5007, TG5009, TG5011, TG5010, TG5012, TG5013, TG5014, TG5015, and TG5016 (Table S2) were screened and selected with apramycin-resistant colonies whose genotype were tested by PCR (Yz--3-F/R, Yz--1-F/R, Yz+3-F/R, Yz+11-F/R, Yz-A1-F/R, Yz-A4-F/R, Yz-Rg<sub>1</sub>-F/R, Yz-Rg<sub>6</sub>-F/R, Yz-C2-F/R, Yz-C3-F/R, Yz-C4-F/R, Yz-O2-F/R, Yz-O5-F/R, Yz-O6-F/R, Yz-O12-F/R, and Yz-B4-F/R as primers, Table S3).

### **Anticancer Activity Assays of TXN-A and Analogues.**

All cell-culture work was conducted in a class II biological safety cabinet. Jurkat cells were maintained in RPMI-1640 medium supplemented with 10% fetal bovine serum (FBS). Jurkat cells

were grown to approximately 80% confluence, and then were collected, and pelleted by centrifugation (3 min at 1000 rpm). The supernatant was discarded and the cell pellet was resuspended in fresh medium, and the concentration of cells was determined using a hemacytometer. The cell suspension was diluted to a concentration of 10000 cells/50  $\mu$ L. The wells of a pre-sterilized 96-well plate were charged with 50  $\mu$ L per well of the diluted cellular suspension. Stock solutions of each compound in DMSO were diluted serially with RPMI-1640 medium (supplemented with FBS), and 50  $\mu$ L resulting solutions were added to the wells containing cells to achieve final concentrations of 0.25 nM to 2 nM (TXN-A) or 0.25 nM to 2500 nM (all other compounds). After incubating at 37 °C and 5% CO<sub>2</sub> for 48 h, 10  $\mu$ L of CCK-8 (Vazyme<sup>TM</sup>CCK-8 Cell Counting Kit) was added to each well. After incubating at 37 °C and 5% CO<sub>2</sub> for 4 h, The optical density was read out at  $\lambda$  = 450 nm with a microplate reader and the background was subtracted at  $\lambda$  = 630 nm. Cells incubated with 0.1% DMSO served as positive control. Three independent replicates were conducted.

1. R. P. Maskey, E. Helmke, O. Kayser, H. H. Fiebig, A. Maier, A. Busche and H. Laatsch, *J. Antibiot. (Tokyo)*. 2004, **57**, 771-779.
2. H. M. Ma, Q. Zhou, Y. M. Tang, Z. Zhang, Y. S. Chen, H. Y. He, H. X. Pan, M. C. Tang, J. F. Gao, S. Y. Zhao, Y. Igarashi and G.-L. Tang, *Chem. Biol.* 2013, **20**, 796-805.



**Table S1. Summary of <sup>13</sup>C NMR data of TXN-A from incorporation of <sup>13</sup>C-labeled acetate**

| Carbon position | <sup>13</sup> C-NMR | Enhanced signal [1- <sup>13</sup> C]-acetate | Enhanced signal [2- <sup>13</sup> C]-acetate | <i>J</i> <sub>c-c</sub> /Hz | [1,2- <sup>13</sup> C <sub>2</sub> ]-acetate feeding adjacent carbon |
|-----------------|---------------------|----------------------------------------------|----------------------------------------------|-----------------------------|----------------------------------------------------------------------|
| 1               | 203.09              | √                                            |                                              | 66.50                       | 9a                                                                   |
| 2               | 67.95               |                                              | √                                            | 46.50                       | 3                                                                    |
| 3               | 36.68               | √                                            |                                              | 46.50                       | 2                                                                    |
| 4               | 67.55               |                                              | √                                            | 58.63                       | 4a                                                                   |
| 4a              | 126.66              | √                                            |                                              | 58.63                       | 4                                                                    |
| 5               | 116.98              |                                              | √                                            | 76.00                       | 6                                                                    |
| 6               | 142.89              | √                                            |                                              | 76.00                       | 5                                                                    |
| 7               | 114.90              |                                              | √                                            | 85.63                       | 8                                                                    |
| 8               | 151.77              | √                                            |                                              | 86.00                       | 7                                                                    |
| 8a              | 114.81              |                                              | √                                            | 85.00                       | 9                                                                    |
| 9               | 163.17              | √                                            |                                              | 85.00                       | 8a                                                                   |
| 9a              | 107.54              |                                              | √                                            | 66.25                       | 1                                                                    |
| 10              | 144.82              |                                              | √                                            | 79.38                       | 10a                                                                  |
| 10a             | 135.46              | √                                            |                                              | 79.38                       | 10                                                                   |
| 11              | 69.22               | √                                            |                                              | 40.13                       | 12                                                                   |
| 12              | 71.47               |                                              | √                                            | 39.75                       | 11                                                                   |
| 13              | 101.59              |                                              | √                                            | 51.38                       |                                                                      |
| 14              | 68.34               |                                              |                                              |                             |                                                                      |
| 15              | 104.69              |                                              |                                              | 80.50                       |                                                                      |
| 16              | 99.76               |                                              |                                              | 79.88                       |                                                                      |
| 17              | 48.21               |                                              |                                              | 35.75                       |                                                                      |
| 18              | 20.39               |                                              | √                                            | 53.63                       |                                                                      |
| 19              | 62.76               |                                              |                                              | 66.50                       |                                                                      |
| 16'             | 56.82               |                                              |                                              |                             |                                                                      |
| 16''            | 56.24               |                                              |                                              |                             |                                                                      |
| 1'              | 97.99               |                                              |                                              |                             |                                                                      |
| 2'              | 36.65               |                                              |                                              |                             |                                                                      |

|     |        |   |   |       |    |
|-----|--------|---|---|-------|----|
| 3'  | 68.83  |   |   |       |    |
| 4'  | 74.43  |   |   |       |    |
| 5'  | 62.90  |   |   |       |    |
| 6'  | 16.89  |   |   |       |    |
| 7'  | 170.41 | √ |   | 74.60 | 8' |
| 8'  | 20.91  |   | √ | 74.50 | 7' |
| 9'  | 25.73  |   |   |       |    |
| 1'' | 94.84  |   |   |       |    |
| 2'' | 31.54  |   |   |       |    |
| 3'' | 70.20  |   |   |       |    |
| 4'' | 79.58  |   |   |       |    |
| 5'' | 63.85  |   |   |       |    |
| 6'' | 14.55  |   |   |       |    |
| 7'' | 210.42 |   | √ |       |    |
| 8'' | 27.78  |   | √ |       |    |

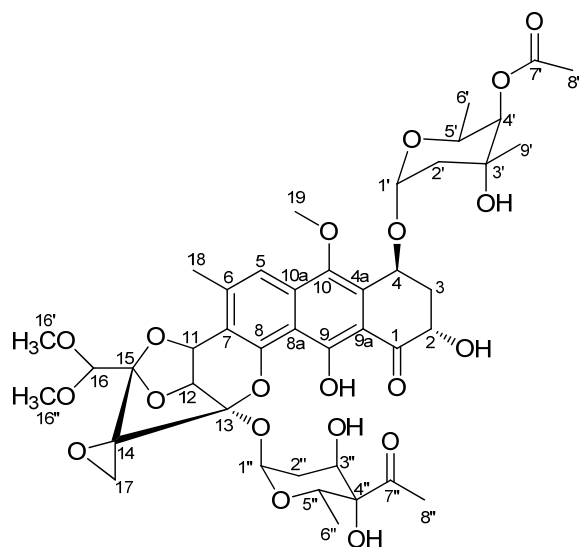

**Table S2. Strains and plasmids used in this study**

| Strain/Plasmid                      | Characteristics                                                                           | Reference  |
|-------------------------------------|-------------------------------------------------------------------------------------------|------------|
| <b>Strains</b>                      |                                                                                           |            |
| <i>E. coli</i> DH5 $\alpha$         | Host for general cloning                                                                  | Invitrogen |
| <i>E. coli</i> S17-1                | Donor strain for conjugation between <i>E. coli</i> and <i>S. bottropensis</i> NRRL 12051 | 1          |
| <i>E. coli</i> BW 25114             | Host for PCR-targeting gene replacement on fosmids                                        | 2          |
| <i>S. bottropensis</i><br>NRRL12051 | Wild type strain, TXN producing                                                           | NRRL       |
| <i>S. bottropensis</i> TG5001       | $\Delta txnA_1$ gene replacement mutant, TXN non-producing                                | This work  |
| <i>S. bottropensis</i> TG5002       | $\Delta orf-3$ gene replacement mutant, TXN producing                                     | This work  |
| <i>S. bottropensis</i> TG5003       | $\Delta orf-1$ gene replacement mutant, TXN producing                                     | This work  |
| <i>S. bottropensis</i> TG5004       | $\Delta txnRg_1$ gene replacement mutant, TXN low-producing                               | This work  |
| <i>S. bottropensis</i> TG5005       | $\Delta orf+11$ gene replacement mutant, TXN low-producing                                | This work  |
| <i>S. bottropensis</i> TG5006       | $\Delta orf+3$ gene replacement mutant, TXN producing                                     | This work  |
| <i>S. bottropensis</i> TG5007       | $\Delta txnRg_6$ gene replacement mutant, TXN low-producing                               | This work  |
| <i>S. bottropensis</i> TG5008       | $\Delta txnA_4$ gene replacement mutant, TXN non-producing                                | This work  |
| <i>S. bottropensis</i> TG5009       | $\Delta txnC_2$ gene replacement mutant, TXN non-producing                                | This work  |
| <i>S. bottropensis</i> TG5010       | $\Delta txnC_4$ gene replacement mutant, TXN non-producing                                | This work  |
| <i>S. bottropensis</i> TG5011       | $\Delta txnO_2$ gene replacement mutant, TXN non-producing                                | This work  |
| <i>S. bottropensis</i> TG5012       | $\Delta txnO_5$ gene replacement mutant, TXN non-producing                                | This work  |
| <i>S. bottropensis</i> TG5013       | $\Delta txnC_3$ gene replacement mutant, TXN non-producing                                | This work  |
| <i>S. bottropensis</i> TG5014       | $\Delta txnO_6$ gene replacement mutant, TXN non-producing                                | This work  |
| <i>S. bottropensis</i> TG5015       | $\Delta txnO_{12}$ gene replacement mutant, TXN non-producing                             | This work  |
| <i>S. bottropensis</i> TG5016       | $\Delta txnB_4$ gene replacement mutant, TXN non-producing                                | This work  |
| <b>Plasmids</b>                     |                                                                                           |            |
| pSP72                               | $Ap^R$ , <i>E. coli</i> subcloning vector                                                 | Promega    |
| pCC1FOS-1 <sup>TM</sup>             | fosmid vector for genomic library construction                                            | Epicentre  |

|         |                                                                                                   |           |
|---------|---------------------------------------------------------------------------------------------------|-----------|
| pTG5001 | pCC1FOS-1-based, <i>S.bottropensis</i> NRRL12051 fosmid containing TXN gene cluster (left part)   | This work |
| pTG5002 | pCC1FOS-1-based, <i>S.bottropensis</i> NRRL12051 fosmid containing TXN gene cluster (middle part) | This work |
| pTG5003 | pCC1FOS-1-based, <i>S.bottropensis</i> NRRL12051 fosmid containing TXN gene cluster (right part)  | This work |
| pTG5004 | pTG5001 derivative for gene replacement of <i>orf-3</i>                                           | This work |
| pTG5005 | pTG5001 derivative for gene replacement of <i>orf-11</i>                                          | This work |
| pTG5006 | pTG5001 derivative for gene replacement of <i>txnA<sub>1</sub></i>                                | This work |
| pTG5007 | pTG5001 derivative for gene replacement of <i>txnRg<sub>1</sub></i>                               | This work |
| pTG5008 | pTG5001 derivative for gene replacement of <i>txnA<sub>4</sub></i>                                | This work |
| pTG5009 | pTG5001 derivative for gene replacement of <i>txnB<sub>4</sub></i>                                | This work |
| pTG5010 | pTG5002 derivative for gene replacement of <i>txnC<sub>2</sub></i>                                | This work |
| pTG5011 | pTG5002 derivative for gene replacement of <i>txnC<sub>4</sub></i>                                | This work |
| pTG5012 | pTG5002 derivative for gene replacement of <i>txnO<sub>2</sub></i>                                | This work |
| pTG5013 | pTG5002 derivative for gene replacement of <i>txnO<sub>5</sub></i>                                | This work |
| pTG5014 | pTG5002 derivative for gene replacement of <i>txnC<sub>3</sub></i>                                | This work |
| pTG5015 | pTG5002 derivative for gene replacement of <i>txnO<sub>6</sub></i>                                | This work |
| pTG5016 | pTG5003 derivative for gene replacement of <i>txnRg<sub>6</sub></i>                               | This work |
| pTG5017 | pTG5003 derivative for gene replacement of <i>txnO<sub>12</sub></i>                               | This work |
| pTG5018 | pTG5003 derivative for gene replacement of <i>orf+3</i>                                           | This work |
| pTG5019 | pTG5003 derivative for gene replacement of <i>orf+11</i>                                          | This work |

*Ap<sup>R</sup>*, ampicillin resistance; *Km<sup>R</sup>*, kanamycin resistance; *Am<sup>R</sup>*, apramycin resistance. *Tsr<sup>R</sup>*, thiostrepton resistance.

- 1 T. Kieser, M. J. Bibb, M. J. Buttner, K. F. Chater and D. A. Hopwood, *Practical Streptomyces Genetics* 2000, (John Innes Foundation, Norwich, UK).
- 2 B. Gust, G. L. Challis, K. Fowler, T. Kieser and K. F. Chater, *Proc. Natl. Acad. Sci. USA* 2003, **100**, 1541–1546.

**Table S3. Primers used in this study**

| Primers     | Sequence (5'→ 3')                                                | Restriction enzyme |
|-------------|------------------------------------------------------------------|--------------------|
| KS-For      | ATCACCGTGGCCTGYTTYGAYGCSATC                                      | Degenerate         |
| KS-Rev      | CCGGTGTTGACSGSRTAGAACCANGC                                       | Degenerate         |
| 4,6-DH-F    | CSGGS GSSGCSGGSTTCATSGG                                          | Degenerate         |
| 4,6-DH-R    | GGGWRCTGGYRSGGSCCGTAGTTG                                         | Degenerate         |
| SK-PKS-II-F | GCGGTCTCGTACTCGGAG                                               | Specific           |
| SK-PKS-II-R | GCCGGCTCGGTATGTGATCG                                             | Specific           |
| SK-dUDP-F   | GTAGTTGTTGGAGCAGCGG                                              | Specific           |
| SK-dUDP-R   | CTCCACGTACGTCCGAGGC                                              | Specific           |
| Orf-3-F     | GAACGAGCCGCGCAATCGATTCCCAGGACCTGTTCCGCATT<br>CCGGGGATCCGTCGACC   | Specific           |
| Orf-3-R     | GCTCCGTGGCCTGGCGGCCTTGTACGTCGTCCTGTTCCATGTA<br>GGCTGGAGCTGCTTC   | Specific           |
| Orf-1-F     | GTCAGAGAGTCTTGAGGGACGAGGCGATGGCCTGGTCGGATT<br>CCGGGGATCCGTCGACC  | Specific           |
| Orf-1-R     | ATCCCGCGTTCGCCGCCATGGACTTCCACGCACCGTATCTGT<br>AGGCTGGAGCTGCTTC   | Specific           |
| Orf+3-F     | GGATGGTGGACACCTTCGTCGAAGAGGTCGGCAGGGTGGATT<br>CCGGGGATCCGTCGACC  | Specific           |
| Orf+3-R     | TGACGCCAGCGCCCTGCGATACGGAGAGGCCATCAGGTTGT<br>AGGCTGGAGCTGCTTC    | Specific           |
| Orf+11-F    | CTTCGACGACGTCTGGAGGCTGCTGCTCGACGACCGGCTATT<br>CCGGGGATCCGTCGACC  | Specific           |
| Orf+11-R    | TCCAGCGCGCCGGTGACCAGTTGGGCGTAGATCGCGACCTGT<br>AGGCTGGAGCTGCTTC   | Specific           |
| TxnA1-F     | ACTTCTACCGATGGCCGATCGGCCACACGCACCATCAGATT<br>CCGGGGATCCGTCGACC   | Specific           |
| TxnA1-R     | GTA CTCCCTCGCGGATCAGCTCCACCGCGTGTCCGATCTGTA<br>GGCTGGAGCTGCTTC   | Specific           |
| TxnA4-F     | GTCAGCGTCTGGCGTGGTCCGGCCTCGACCAGGAGCATGATT<br>CCGGGGATCCGTCGACC  | Specific           |
| TxnA4-R     | GGTCATCGGCATCGACGACGTCCGGCGTGCCAGCCTCTTGT<br>AGGCTGGAGCTGCTTC    | Specific           |
| TxnRg1-F    | GAAGCGGA ACTGCGGGTCATTGGCAGGCTCCTGGCAGCCATT<br>CCGGGGATCCGTCGACC | Specific           |
| TxnRg1-R    | CCGGGTGCCGACCTTAGACGGTGCAGGCCATGGAACGGCTGT<br>AGGCTGGAGCTGCTTC   | Specific           |
| TxnRg6-F    | CCTCGACCCAACGCCCTTGGGCCGTCTTCGACATCGACGTGT<br>AGGCTGGAGCTGCTTC   | Specific           |
| TxnRg6-R    | GGATGGTGGACACCTTCGTCGAAGAGGTCGGCAGGGTGGATT<br>CCGGGGATCCGTCGACC  | Specific           |
| TxnC2-F     | CATGGCGGTCTTCGGGTGTGCTCGTGGCGCCGAGAACGTATT<br>CCGGGGATCCGTCGACC  | Specific           |
| TxnC2-R     | CAGACGGCGTTACGGTGACGCCGGTCCGCGCCAGTTCCTGT<br>AGGCTGGAGCTGCTTC    | Specific           |
| TxnC3-F     | GGATGCCTCCGTA CTGGTGGACACCGCCGCCACCGAAGCATT<br>CCGGGGATCCGTCGACC | Specific           |
| TxnC3-R     | CACCACCGCAGGTAGTTCTCGGTCCGGTCCAGCAGTTCCTGT<br>AGGCTGGAGCTGCTTC   | Specific           |

|          |                                                                 |          |
|----------|-----------------------------------------------------------------|----------|
| TxnC4-F  | GTTACGAAGCAGCCGGTGGGACCGTCCGCGTCGAGCGTGATT<br>CCGGGGATCCGTCGACC | Specific |
| TxnC4-R  | CCGCATCGACGAGCGGCACGGCCGGCTGGACATCCTCATTGT<br>AGGCTGGAGCTGCTTC  | Specific |
| TxnO2-F  | AGATCCGGACACCGCTCCAGCAGCACGCGCAGGGCGATGAT<br>TCCGGGGATCCGTCGACC | Specific |
| TxnO2-R  | GGACCGCGCCGACTTCCACCTGTGGTCGAGCGATCTGTCTGT<br>AGGCTGGAGCTGCTTC  | Specific |
| TxnO5-F  | GGAAGAGCTTGCTCCACACGATCTCCAGCTCCAGGCGTGATT<br>CCGGGGATCCGTCGACC | Specific |
| TxnO5-R  | TCAACGCCTACATCAGCGACCTGATCCAGACCAAGCGCCTGT<br>AGGCTGGAGCTGCTTC  | Specific |
| TxnO6-F  | GCGAACAGGTTGACATGACGCAGGAGTTCGTCCACCGCGATT<br>CCGGGGATCCGTCGACC | Specific |
| TxnO6-R  | GCAGTCGGTCTTCGACGAACTGCTCGACGACATCGAGGC<br>TGTAGGCTGGAGCTGCTTC  | Specific |
| TxnO12-F | GGAACGGACGGCGGTCTTCGCTTCCAGCCTGGCCAGCGGATT<br>CCGGGGATCCGTCGACC | Specific |
| TxnO12-R | GGAGTTCGGTTCGGCGACCGTGACAAGTTCACCGCTGG<br>TGTAGGCTGGAGCTGCTTC   | Specific |
| TxnB4-F  | GAGGACCAGTACACGTGCGCACGCTCACCTATTGGCAGGATT<br>CCGGGGATCCGTCGACC | Specific |
| TxnB4-R  | CATGCACCATGAGCGAGGTCGCGACCACCGTGACGTCGTTGT<br>AGGCTGGAGCTGCTTC  | Specific |
| Yz--3-F  | AGTGGTACGCCGTCACTC                                              | Specific |
| Yz--3-R  | CAGTGCTCTCGACCTGGC                                              | Specific |
| Yz--1-F  | AGCGACGCGTTCTCGGCTG                                             | Specific |
| Yz--1-R  | ACGCGCGGCGATGTGGACTG                                            | Specific |
| Yz+3-F   | CGCATGCGTGACATCCTC                                              | Specific |
| Yz+3-R   | CGATGTCCACCAGGTCGC                                              | Specific |
| Yz+11-F  | CGCCTCGTGGTACATCACC                                             | Specific |
| Yz+11-R  | AGGCTGCCTCCAGTGCCAC                                             | Specific |
| Yz-A1-F  | TGCGGAGAGTCGCCATCAC                                             | Specific |
| Yz-A1-R  | CGTGGATGGCGTCGAAGC                                              | Specific |
| Yz-A4-F  | GCGCGAACGATGTCAGCG                                              | Specific |
| Yz-A4-R  | GGACCTCATGGACGACGAG                                             | Specific |
| Yz-Rg1-F | AGTCCACATCGCCGCGCGTG                                            | Specific |
| Yz-Rg1-R | ACTGCGGATCGGAGAGTCG                                             | Specific |
| Yz-Rg6-F | GCACTCGGAACGTAGACG                                              | Specific |
| Yz-Rg6-R | TTCGACACCCTCTCGGAGG                                             | Specific |
| Yz-C2-F  | CCATCGTTACCGGCGCGAC                                             | Specific |
| Yz-C2-R  | GCCGTAGTACTCGGCATGG                                             | Specific |
| Yz-C3-F  | CTGAACAACGCCGGGCTGG                                             | Specific |
| Yz-C3-R  | GCCAGCAGGCCTTCCTGTG                                             | Specific |
| Yz-C4-F  | GCCGTCCGACGGTCACCAG                                             | Specific |

|          |                      |          |
|----------|----------------------|----------|
| Yz-C4-R  | CGCGACAAGGCTCGCGGT   | Specific |
| Yz-O2-F  | TCTCGTACGGCACCGCCAG  | Specific |
| Yz-O2-R  | TCCGCTGTCGGTCATCTGC  | Specific |
| Yz-O5-F  | AAGGCCTGGCGAGCCTCAG  | Specific |
| Yz-O5-R  | CAGGACCGGCACGACTTCT  | Specific |
| Yz-O6-F  | AAGCCGGAGGTGTCGGTCG  | Specific |
| Yz-O6-R  | CATGGACTCGCCCGAGCAC  | Specific |
| Yz-O12-F | CGTCGAGGGCCAGGTCCGG  | Specific |
| Yz-O12-R | GTCCAGGACTTCGCGTTC   | Specific |
| Yz-B4-F  | GCTGACACCGGTGCACTCG  | Specific |
| Yz-B4-R  | GCACCATGAGCGAGGTCGCG | Specific |

Legend: R, A or G; Y, C or T; M, A or C; K, G or T; S, C or G; W, A or T; H, A, C, or T; B, C, G, or T; V, A, C, or G; D, A, G, or T; N, any nucleotide.

Table S4. <sup>1</sup>H- and <sup>13</sup>C-NMR data of **4a** and **4b**

| <b>4a</b> |            |                            | <b>4b</b>  |                         |
|-----------|------------|----------------------------|------------|-------------------------|
| No.       | $\delta_C$ | $\delta_H$                 | $\delta_C$ | $\delta_H$              |
| 1         | 174.41     |                            | 174.93     |                         |
| 2         | 90.43      |                            | 90.02      |                         |
| 3         | 168.74     |                            | 168.88     |                         |
| 4         | 103.62     | 5.57 (s,1H)                | 104.09     | 5.57 (s, 1H)            |
| 5         | 166.55     |                            | 166.39     |                         |
| 6         | 119.85     |                            | 119.28     |                         |
| 7         | 139.8      |                            | 140.2      |                         |
| 8         | 103.8      | 6.30(d,2.4 Hz, 1H)         | 103.64     | 6.31 (d, 1.1 Hz, 1H)    |
| 9         | 164.2      |                            | 164.41     |                         |
| 10        | 112.75     | 6.22(d,2.4Hz,1H)           | 113.02     | 6.23 (d, 1.3 Hz, 1H)    |
| 11        | 106.48     |                            | 106.48     |                         |
| 12        | 38.88      | 3.57 (s, 2H)               | 38.82      | 3.60 (s, 2H)            |
| 13        | 203.12     |                            | 203.24     |                         |
| 14        | 121.89     |                            | 121.64     |                         |
| 15        | 159.18     |                            | 158.59     |                         |
| 16        | 101.9      | 6.14(d, 2.2Hz, 1H)         | 101.87     | 6.14 (s, 1H)            |
| 17        | 162.56     |                            | 162.35     |                         |
| 18        | 106.48     | 6.25(d,2.2 Hz, 1H)         | 106.08     | 6.31 (d, 1.1 Hz, 1H)    |
| 19        | 150.67     |                            | 165.66     |                         |
| 20        | 39.02      | 2.45 (Sept, 6.8 Hz, 1H)    | 32.01      | 2.74 (sept, 6.2 Hz, 1H) |
| 21        | 32.43      | 1.37 (m, 1H), 1.46 (m, 1H) | 22.18      | 1.06 (d, 6.2 Hz, 3H)    |
| 22        | 12.92      | 0.69 (t, 7.4 Hz, 3H)       | 22.18      | 1.06 (d, 6.2 Hz, 3H)    |
| 23        | 22.18      | 1.01 (d, 4.9 Hz, 3H)       |            |                         |



Table S5.  $^1\text{H}$ - and  $^{13}\text{C}$ -NMR data of **6a**

| No. | $\delta_C$ | $\delta_H$                  |
|-----|------------|-----------------------------|
| 1   | 165.26     |                             |
| 2   | 89.7       | 5.34 (s, 1H)                |
| 3   | 172.19     |                             |
| 4   | 101.61     | 5.79 (s, 1H)                |
| 5   | 167.7      |                             |
| 6   | 38.1       | 4.18 (q, 16.0 Hz, 2H)       |
| 7   | 136.23     |                             |
| 8   | 125.6      | 6.81 (d, 7.4 Hz, 1H)        |
| 9   | 135.4      | 7.32 (t, 7.9 Hz, 1H)        |
| 10  | 118.51     | 6.84 (d, 8.9 Hz, 1H)        |
| 11  | 159.47     |                             |
| 12  | 118.66     |                             |
| 13  | 192.44     |                             |
| 14  | 48.54      | 2.81(m, 1H),2.94(m, 1H)     |
| 15  | 100.82     |                             |
| 16  | 47.34      | 2.81(m, 1H),2.91(m, 1H)     |
| 17  | 194.14     |                             |
| 18  | 100.42     | 5.59 (s, 1H)                |
| 19  | 195.64     |                             |
| 20  | 42.95      | 2.23(m,1H)                  |
| 21  | 27.18      | 1.44(m, 1H), 1.64(m, 1H)    |
| 22  | 11.71      | 0.88 (dd, 13.3, 7.2 Hz, 3H) |
| 23  | 17.24      | 1.11 (dt, 8.0, 4.0 Hz, 3H)  |

Table S6.  $^1\text{H}$ - and  $^{13}\text{C}$ -NMR data of **9a**

| No.  | $\delta_{\text{C}}$ | $\delta_{\text{H}}$  |
|------|---------------------|----------------------|
| 1    | 205.82              |                      |
| 2    | 34.13               |                      |
| 3    | 30.39               |                      |
| 4    | 63.18               | 5.34(4, 4.2 Hz, 1H)  |
| 4a   | 110.93              |                      |
| 5    | 120.69              | 7.85 (s, 1H)         |
| 6    | 139.84              |                      |
| 6-Me | 24.03               | 2.86 (s, 3H)         |
| 7    | 119.76              |                      |
| 8    | 151.59              |                      |
| 8a   | 117.8               |                      |
| 9    | 157.16              |                      |
| 9a   | 112.95              |                      |
| 10   | 157.99              |                      |
| 10a  | 133.33              |                      |
| 11   | 178.96              |                      |
| 12   | 109.8               | 6.46(s, 1H)          |
| 13   | 172.74              |                      |
| 14   | 73.12               |                      |
| 15   | 33.12               | 2.16 (m, 2H)         |
| 16   | 8.35                | 0.79 (t, 6.0 Hz, 3H) |
| 17   | 26.94               | 1.55 (s, 3H)         |

Table S7. <sup>1</sup>H- and <sup>13</sup>C-NMR data of **12a** and **12b**

| <b>12a</b>           |            |                                                       | <b>12b</b> |                                               |
|----------------------|------------|-------------------------------------------------------|------------|-----------------------------------------------|
| No.                  | $\delta_C$ | $\delta_H$                                            | $\delta_C$ | $\delta_H$                                    |
| 1                    | 203.11     |                                                       | 202.9      |                                               |
| 2                    | 67.83      | 4.77 (dd, 12.2, 5.3 Hz, 1H)                           | 67.94      | 4.78 (dd, 11.7, 4.1 Hz, 1H)                   |
| 3                    | 36.76      | 2.23 (m, 1H), 2.78 (m, 1H)                            | 36.62      | 2.20 (m, 1H), 2.81 (m, 1H)                    |
| 4                    | 68.07      | 5.38 (d, 3.1 Hz, 1H)                                  | 67.46      | 5.39 (d, 2.8 Hz, 1H)                          |
| 4a                   | 126.58     |                                                       | 126.48     |                                               |
| 5                    | 116.91     | 7.47 (s, 1H)                                          | 116.87     | 7.49 (s, 1H)                                  |
| 6                    | 143.17     |                                                       | 143.07     |                                               |
| 6-Me                 | 20.65      | 2.59 (s, 3H)                                          | 20.45      | 2.61 (s, 3H)                                  |
| 7                    | 114.93     |                                                       | 115        |                                               |
| 8                    | 151.78     |                                                       | 151.83     |                                               |
| 8a                   | 115.5      |                                                       | 114.78     |                                               |
| 9                    | 163.18     |                                                       | 163.25     |                                               |
| 9a                   | 107.52     |                                                       | 107.39     |                                               |
| 10                   | 144.99     |                                                       | 144.83     |                                               |
| 10-Me                | 62.84      | 3.83 (s, 3H)                                          | 62.75      | 3.84 (s, 3H)                                  |
| 10a                  | 135.56     |                                                       | 135.42     |                                               |
| 11                   | 69.32      | 4.86 (d, 3.7 Hz, 1H)                                  | 69.1       | 5.22(d, 4.1 Hz, 1H)                           |
| 12                   | 73.46      | 5.25(d, 3.7 Hz, 1H)                                   | 71.47      | 5.35(d, 4.1 Hz, 1H)                           |
| 13                   | 100.26     |                                                       | 101.57     |                                               |
| 14                   | 68.98      |                                                       | 68.31      |                                               |
| 15                   | 104.12     |                                                       | 104.61     |                                               |
| 16                   | 99.02      | 4.75 (s, 1H)                                          | 99.6       | 4.75 (s, 1H)                                  |
| 16-OMe               | 56.82      | 3.47 (s, 3H)                                          | 56.81      | 3.45 (s, 3H)                                  |
| 16-OMe               | 57.27      | 3.61 (s, 3H)                                          | 56.84      | 3.61 (s, 3H)                                  |
| 17                   | 50.9       | 3.02 (d, 5.3 Hz, 1H),<br>3.12 (d, 5.3 Hz, 1H)         | 47.97      | 2.86 (d, 5.7 Hz, 1H),<br>2.93 (d, 5.7 Hz, 1H) |
| 1'                   | 98.22      | 5.38 (d, 3.1 Hz, 1H)                                  | 97.96      | 5.37 (t, 4.0 Hz, 1H)                          |
| 2'                   | 36.7       | 1.62 (d, 14.6 Hz, 1H),<br>1.96 (dd, 14.6, 4.0 Hz, 1H) | 35.57      | 1.62 (d, 14.5 Hz, 1H),<br>1.96 (m, 1H)        |
| 3'                   | 69.55      |                                                       | 68.83      |                                               |
| 3'-Me                | 25.83      | 1.07 (s, 3H)                                          | 25.71      | 1.07 (s, 3H)                                  |
| 4'                   | 74.53      | 4.71 (s, 1H)                                          | 74.4       | 4.73 (s, 1H)                                  |
| 5'                   | 63.03      | 4.54 q, 6.4 Hz, 1H)                                   | 62.91      | 4.54 (q, 6.3 Hz, 1H)                          |
| 6'                   | 17         | 1.24 (d, 6.4 Hz, 1H)                                  | 16.89      | 1.29 (d, 6.3 Hz, 1H)                          |
| 4'-COCH <sub>3</sub> | 21.05      | 2.14 (s, 3H)                                          | 20.93      | 2.14 (s, 3H)                                  |
| 4'-COCH <sub>3</sub> | 170.57     |                                                       | 170.41     |                                               |
| 1''                  |            |                                                       | 94.83      | 5.79 (d, 3.0 Hz, 1H)                          |
| 2''                  |            |                                                       | 29.71      | 2.07 (m, 1H), 2.20 (m, 1H)                    |
| 3''                  |            |                                                       | 69.97      | 3.61 (m, 1H)                                  |
| 4''                  |            |                                                       | 74.57      |                                               |
| 5''                  |            |                                                       | 64.37      | 4.76 (m, 1H)                                  |

|       |       |                    |
|-------|-------|--------------------|
| 6"    | 16.77 | 1.24 (overlap, 3H) |
| 4"-Me | 26.28 | 1.34 (s, 3H)       |

Table S8. <sup>1</sup>H- and <sup>13</sup>C-NMR data of **13a** and **13b**

| <b>13a</b>           |            |                                              | <b>13b</b>                                   |
|----------------------|------------|----------------------------------------------|----------------------------------------------|
| No.                  | $\delta_C$ | $\delta_H$                                   | $\delta_H$                                   |
| 1                    | 202.37     |                                              |                                              |
| 2                    | 67.93      | 4.70 (m, 1H)                                 | 4.71 (m, 1H)                                 |
| 3                    | 48.04      | 3.13 (m, 2H)                                 | 3.13(m, 2H)                                  |
| 4                    | 192.86     |                                              |                                              |
| 4a                   | 121.24     |                                              |                                              |
| 5                    | 116.41     | 7.75 (s, 1H)                                 | 7.78(s, 1H)                                  |
| 6                    | 143.25     |                                              |                                              |
| 6-Me                 | 18.68      | 2.61 (s, 3H)                                 | 2.61(s, 3H)                                  |
| 7                    | 117.84     |                                              |                                              |
| 8                    | 150.72     |                                              |                                              |
| 8a                   | 117.84     |                                              |                                              |
| 9                    | 161.58     |                                              |                                              |
| 9a                   |            |                                              |                                              |
| 10                   | 146.62     |                                              |                                              |
| 10a                  | 136.19     |                                              |                                              |
| 11                   | 69.64      | 5.29 (d, 3.2 Hz, 1H)                         | 5.29 (d, 4.1 Hz, 1H)                         |
| 12                   | 71.51      | 5.49 (d, 3.2 Hz, 1H)                         | 5.49 (d, 4.1 Hz, 1H)                         |
| 13                   | 101.86     |                                              |                                              |
| 14                   | 68.97      |                                              |                                              |
| 15                   | 104.5      |                                              |                                              |
| 16                   | 100.06     | 4.73 (d, 1.0 Hz, 1H)                         | 4.69(s, 1H)                                  |
| 16-OMe               | 55.45      | 3.45 (d, 1.0 Hz, 3H)                         | 3.42 (s, 3H)                                 |
| 16-OMe               | 55.52      | 3.60 (d, 1.0 Hz, 3H)                         | 3.57 (s, 3H)                                 |
| 17                   | 47.86      | 2.71 (d, 5.6 Hz, 1H)<br>2.86 (d, 5.6 Hz, 1H) | 2.73 (d, 5.7 Hz, 1H)<br>2.87 (d, 5.7 Hz, 1H) |
| 1"                   | 94.23      | 5.84 (s, 1H)                                 | 5.80 (d, 3.2 Hz, 1H)                         |
| 2"                   | 31.1       | 2.38 (m, 1H), 2.05 (m, 1H)                   |                                              |
| 3"                   | 70.12      | 3.66 (m, 1H)                                 |                                              |
| 4"                   | 79.1       |                                              |                                              |
| 5"                   | 64.38      | 4.94 (q, 6.3 Hz, 1H)                         | 4.95 (q, 6.3 Hz, 1H)                         |
| 6"                   | 13.61      | 1.14 (d, 6.3 Hz, 3H)                         | 1.30 (d, 6.3 Hz, 3H)                         |
| 4"-COCH <sub>3</sub> | 210.4      |                                              | 3.85 (q, 6.5 Hz, 1H)                         |
| 4"-COCH <sub>3</sub> | 24.83      | 2.30 (s, 3H)                                 | 1.29 (d, 6.6 Hz, 3H)                         |

Table S9. <sup>1</sup>H- and <sup>13</sup>C-NMR data of **14a**

| No.                   | $\delta_C$   | $\delta_H$                                          |
|-----------------------|--------------|-----------------------------------------------------|
| 1                     | 203.13       |                                                     |
| 2                     | 68.07        | 4.76 (dd, 12.7, 5.3 Hz, 1H)                         |
| 3                     | 36.79        | 2.19(td, 13.3, 2.6 Hz, 1H), 2.78(m, 1H)             |
| 4                     | 67.66        | 5.38 (m, 1H)                                        |
| 4a                    | 126.77       |                                                     |
| 5                     | 117.08       | 7.50 (s, 1H)                                        |
| 6                     | 142.93       |                                                     |
| 6-Me                  | 20.44        | 2.61(s, 3H)                                         |
| 7                     | 115.24       |                                                     |
| 8                     | 151.87       |                                                     |
| 8a                    | 114.96       |                                                     |
| 9                     | 163.3        |                                                     |
| 9a                    | 107.62       |                                                     |
| 10                    | 144.96       |                                                     |
| 10-Me                 | 62.87        | 3.83 (s, 3H)                                        |
| 10a                   | 135.57       |                                                     |
| 11                    | 69.52        | 5.22 (d, 4.2 Hz, 1H)                                |
| 12                    | 71.85        | 5.35 (d, 4.2 Hz, 1H)                                |
| 13                    | 101.74       |                                                     |
| 14                    | 68.55        |                                                     |
| 15                    | 105.16       |                                                     |
| <b>16</b>             | <b>67.66</b> | <b>3.72(d, 11.25 Hz, 1H), 3.79(d, 11.25 Hz, 1H)</b> |
| 16-OMe                |              |                                                     |
| 16-OMe                | 60.41        | 3.47 (s, 3H)                                        |
| 17                    | 48.29        | 2.93 (d, 5.2 Hz, 1H), 2.87 (d, 5.2 Hz, 1H)          |
| 1'                    | 98.14        | 5.37(m, 1H)                                         |
| 2'                    | 36.79        | 1.60 (d, 14.6 Hz, 1H), 1.94 (m, 1H)                 |
| 3'                    | 68.94        |                                                     |
| 3'- Me                | 25.83        | 1.05 (s, 3H)                                        |
| 4'                    | 74.55        | 4.72(m, 1H)                                         |
| 5'                    | 63.03        | 4.51 (m, 1H)                                        |
| 6'                    | 16.99        | 1.22 (d, $J = 6.8$ , 3H)                            |
| 4'-COCH <sub>3</sub>  | 21           | 2.12(s, 3H)                                         |
| 4'-COCH <sub>3</sub>  | 170.47       |                                                     |
| 1''                   | 94.95        | 5.83 (d, $J = 2.3$ Hz, 1H)                          |
| 2''                   | 31.67        | 2.11(m, 1H), 2.42(m, 1H)                            |
| 3''                   | 70.33        | 3.68(m, 1H)                                         |
| 4''                   | 79.7         |                                                     |
| 5''                   | 63.94        | 4.97 (m, 1H)                                        |
| 6''                   | 14.66        | 1.07(d, 6.4 Hz, 3H)                                 |
| 4''-COCH <sub>3</sub> | 27.95        | 2.47 (s, 3H)                                        |

Table S10. <sup>1</sup>H- and <sup>13</sup>C-NMR data of **15a** and **15b**

| <b>15a</b>           |            |                                                 | <b>15b</b> |                                              |
|----------------------|------------|-------------------------------------------------|------------|----------------------------------------------|
| No.                  | $\delta_C$ | $\delta_H$                                      | $\delta_C$ | $\delta_H$                                   |
| 1                    | 203.47     |                                                 | 203.81     |                                              |
| 2                    | 32.6       | 2.67 (m, 1H),<br>3.01(m, 1H)                    | 32.91      | 2.65 (m, 1H)<br>3.14 (m, 1H)                 |
| 3                    | 28.55      | 2.21(m,1H), 2.41(m,<br>1H)                      | 27.74      | 2.26(m,1H), 2.43(m, 1H)                      |
| 4                    | 66.42      | 5.36 (m, 1H)                                    | 62.5       | 5.41 (m, 1H)                                 |
| 4a                   | 126.98     |                                                 | 130.41     |                                              |
| 5                    | 117.04     | 7.50 (d, 0.6 Hz, 1H)                            | 116.18     | 7.49 (d, 0.6 Hz, 1H)                         |
| 6                    | 142.37     |                                                 | 141.84     |                                              |
| 6-Me                 | 20.47      | 2.59 (s, 3H)                                    | 20.52      | 2.62(s, 3H)                                  |
| 7                    | 114.97     |                                                 | 114.38     |                                              |
| 8                    | 151.89     |                                                 | 152.09     |                                              |
| 8a                   | 114.65     |                                                 | 114.33     |                                              |
| 9                    | 163.43     |                                                 | 162.97     |                                              |
| 9a                   | 109.44     |                                                 | 109.31     |                                              |
| 10                   | 144.29     |                                                 | 143.16     |                                              |
| 10-Me                | 62.99      | 3.83 (s, 3H)                                    | 62.97      | 3.93(s,3H)                                   |
| 10a                  | 135.26     |                                                 | 135.5      |                                              |
| 11                   | 69.42      | 5.22 (d, 4.1 Hz, 1H)                            | 70.42      | 5.25 (d, 4.1 Hz, 1H)                         |
| 12                   | 71.61      | 5.33 (d, 4.1 Hz, 1H)                            | 71.45      | 5.36 (d, 4.1 Hz, 1H)                         |
| 13                   | 101.64     |                                                 | 101.51     |                                              |
| 14                   | 69         |                                                 | 69.5       |                                              |
| 15                   | 104.8      |                                                 | 104.04     |                                              |
| 16                   | 99.84      | 4.75 (s, 1H)                                    | 99.89      | 4.78(s,1H)                                   |
| 16-OMe               | 56.93      | 3.47 (s, 3H)                                    | 56.92      | 3.50 (s, 3H)                                 |
| 16-OMe               | 56.33      | 3.61 (s, 3H)                                    | 56.15      | 3.64 (s, 3H)                                 |
| 17                   | 48.37      | 2.97 (d, 5.7 Hz, 1H)<br>2.92 (d, 5.7 Hz, 1H)    | 48.33      | 2.98 (d, 5.7 Hz, 1H)<br>2.91 (d, 5.7 Hz, 1H) |
| 1'                   | 97.13      | 5.25 (d, 3.6 Hz, 1H)<br>1.92 (dd, 14.5, 4.0 Hz, |            |                                              |
| 2'                   | 36.65      | 1H)<br>1.59 (d, 14.6 Hz, 1H)                    |            |                                              |
| 3'                   | 68.5       |                                                 |            |                                              |
| 3'- Me               | 25.8       | 1.05 (s, 3H)                                    |            |                                              |
| 4'                   | 74.62      | 4.72 (s, 1H)                                    |            |                                              |
| 5'                   | 62.89      | 4.48 (d, 7.2 Hz, 1H)                            |            |                                              |
| 6'                   | 17.04      | 1.21 (d, 6.8, 3H)                               |            |                                              |
| 4'-COCH <sub>3</sub> | 21.04      | 2.11 (s, 3H)                                    |            |                                              |

|                               |        |                         |       |                        |  |
|-------------------------------|--------|-------------------------|-------|------------------------|--|
| 4'- <u>C</u> OCH <sub>3</sub> | 170.54 |                         |       |                        |  |
| 1"                            | 94.93  | 5.83 (d, 2.6 Hz, 1H)    | 94.99 | 5.86 (d, 2.7 Hz, 1H)   |  |
| 2"                            | 31.68  | 2.41(m,1H), 2.11(m, 1H) | 31.77 | 2.45(m,1H), 2.13(m,1H) |  |
| 3"                            | 70.36  | 3.70(m,1H)              | 70.42 | 3.70(m,1H)             |  |
| 4"                            | 79.74  |                         | 79.79 |                        |  |
| 5"                            | 63.93  | 5.00 (q, 6.4 Hz, 1H)    | 63.97 | 5.03 (q, 6.4 Hz, 1H)   |  |
| 6"                            | 14.68  | 1.07(d, 6.4 Hz, 3H)     | 14.47 | 1.10(d,6.4 Hz, 3H)     |  |
| 4"-CO <u>C</u> H <sub>3</sub> | 27.95  | 2.47 (s, 3H)            | 27.74 | 2.50 (s, 3H)           |  |
| 4"- <u>C</u> OCH <sub>3</sub> | 210.58 |                         | 211.4 |                        |  |

Table S11. HRESIMS data of compounds **4a~15b**

| Comp. Name | Mass     | Formula                                         | Tgt Mass | Diff (ppm) | MFG Formula                                     | DB Formula                                      |
|------------|----------|-------------------------------------------------|----------|------------|-------------------------------------------------|-------------------------------------------------|
| <b>4a</b>  | 426.1309 | C <sub>23</sub> H <sub>22</sub> O <sub>8</sub>  | 426.1315 | -1.37      | C <sub>23</sub> H <sub>22</sub> O <sub>8</sub>  | C <sub>23</sub> H <sub>22</sub> O <sub>8</sub>  |
| <b>4b</b>  | 412.114  | C <sub>22</sub> H <sub>20</sub> O <sub>8</sub>  | 412.1158 | -5.74      | C <sub>22</sub> H <sub>20</sub> O <sub>8</sub>  | C <sub>22</sub> H <sub>20</sub> O <sub>8</sub>  |
| <b>6a</b>  | 428.149  | C <sub>23</sub> H <sub>24</sub> O <sub>8</sub>  | 428.1471 | 4.72       | C <sub>23</sub> H <sub>24</sub> O <sub>8</sub>  | C <sub>23</sub> H <sub>24</sub> O <sub>8</sub>  |
| <b>9a</b>  | 398.135  | C <sub>22</sub> H <sub>22</sub> O <sub>7</sub>  | 398.1366 | -3.41      | C <sub>22</sub> H <sub>22</sub> O <sub>7</sub>  | C <sub>22</sub> H <sub>22</sub> O <sub>7</sub>  |
| <b>12a</b> | 704.226  | C <sub>34</sub> H <sub>40</sub> O <sub>16</sub> | 704.2316 | -7.68      | C <sub>34</sub> H <sub>40</sub> O <sub>16</sub> | C <sub>34</sub> H <sub>40</sub> O <sub>16</sub> |
| <b>12b</b> | 848.304  | C <sub>41</sub> H <sub>52</sub> O <sub>19</sub> | 848.3103 | -7.39      | C <sub>41</sub> H <sub>52</sub> O <sub>19</sub> | C <sub>41</sub> H <sub>52</sub> O <sub>19</sub> |
| <b>13a</b> | 688.203  | C <sub>33</sub> H <sub>36</sub> O <sub>16</sub> | 688.2003 | 3.7        | C <sub>33</sub> H <sub>36</sub> O <sub>16</sub> | C <sub>33</sub> H <sub>36</sub> O <sub>16</sub> |
| <b>13b</b> | 690.217  | C <sub>33</sub> H <sub>38</sub> O <sub>16</sub> | 690.2160 | 1.14       | C <sub>33</sub> H <sub>38</sub> O <sub>16</sub> | C <sub>33</sub> H <sub>38</sub> O <sub>16</sub> |
| <b>14a</b> | 846.297  | C <sub>41</sub> H <sub>50</sub> O <sub>19</sub> | 846.2946 | 2.35       | C <sub>41</sub> H <sub>50</sub> O <sub>19</sub> | C <sub>41</sub> H <sub>50</sub> O <sub>19</sub> |
| <b>15a</b> | 860.309  | C <sub>42</sub> H <sub>52</sub> O <sub>19</sub> | 860.3103 | -1.18      | C <sub>42</sub> H <sub>52</sub> O <sub>19</sub> | C <sub>42</sub> H <sub>52</sub> O <sub>19</sub> |
| <b>15b</b> | 674.22   | C <sub>33</sub> H <sub>38</sub> O <sub>15</sub> | 674.2211 | -2.14      | C <sub>33</sub> H <sub>38</sub> O <sub>15</sub> | C <sub>33</sub> H <sub>38</sub> O <sub>15</sub> |

Fig. S1  $^{13}\text{C}$  NMR data of TXN-A from the incorporation of  $^{13}\text{C}$ -labeled acetate.

**A**

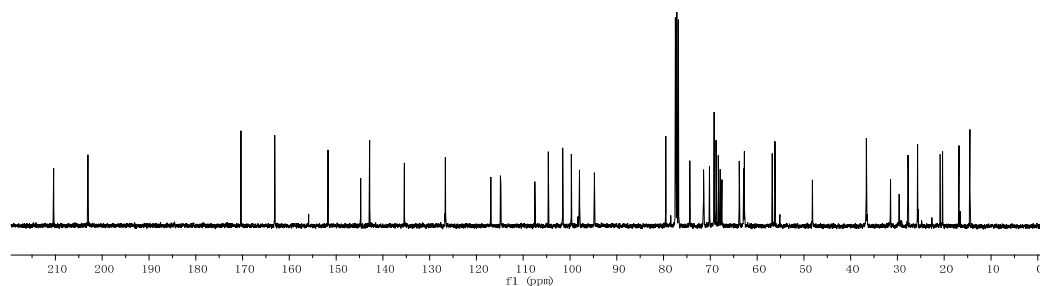

**B**

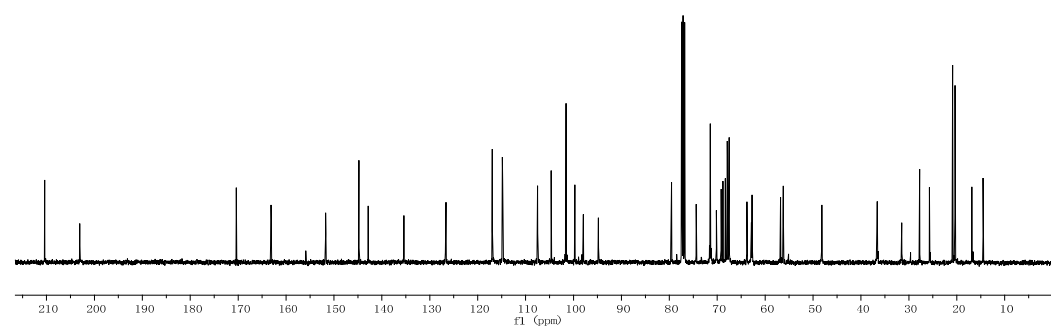

**C**

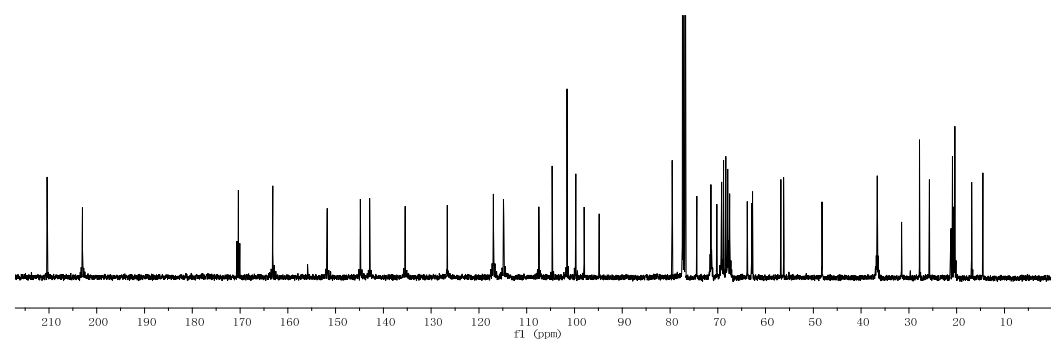

**D**

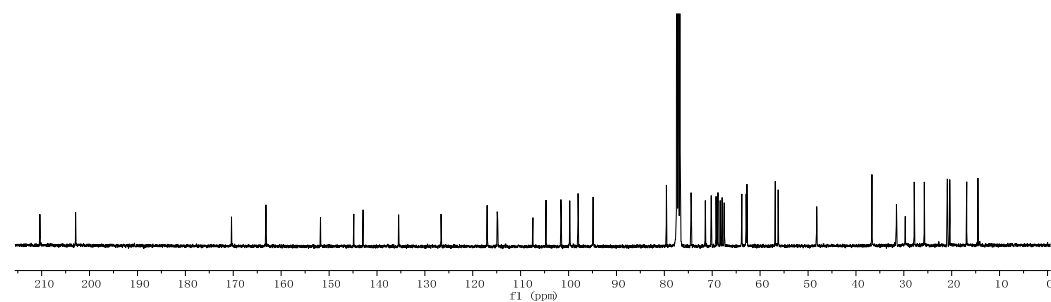

(A)  $[1-^{13}\text{C}]$ -acetate; (B)  $[2-^{13}\text{C}]$ -acetate; (C)  $[1,2-^{13}\text{C}_2]$ -acetate; (D) No feeding as control.



Fig. S2 Identification of the genotype of mutants via homologous recombination.

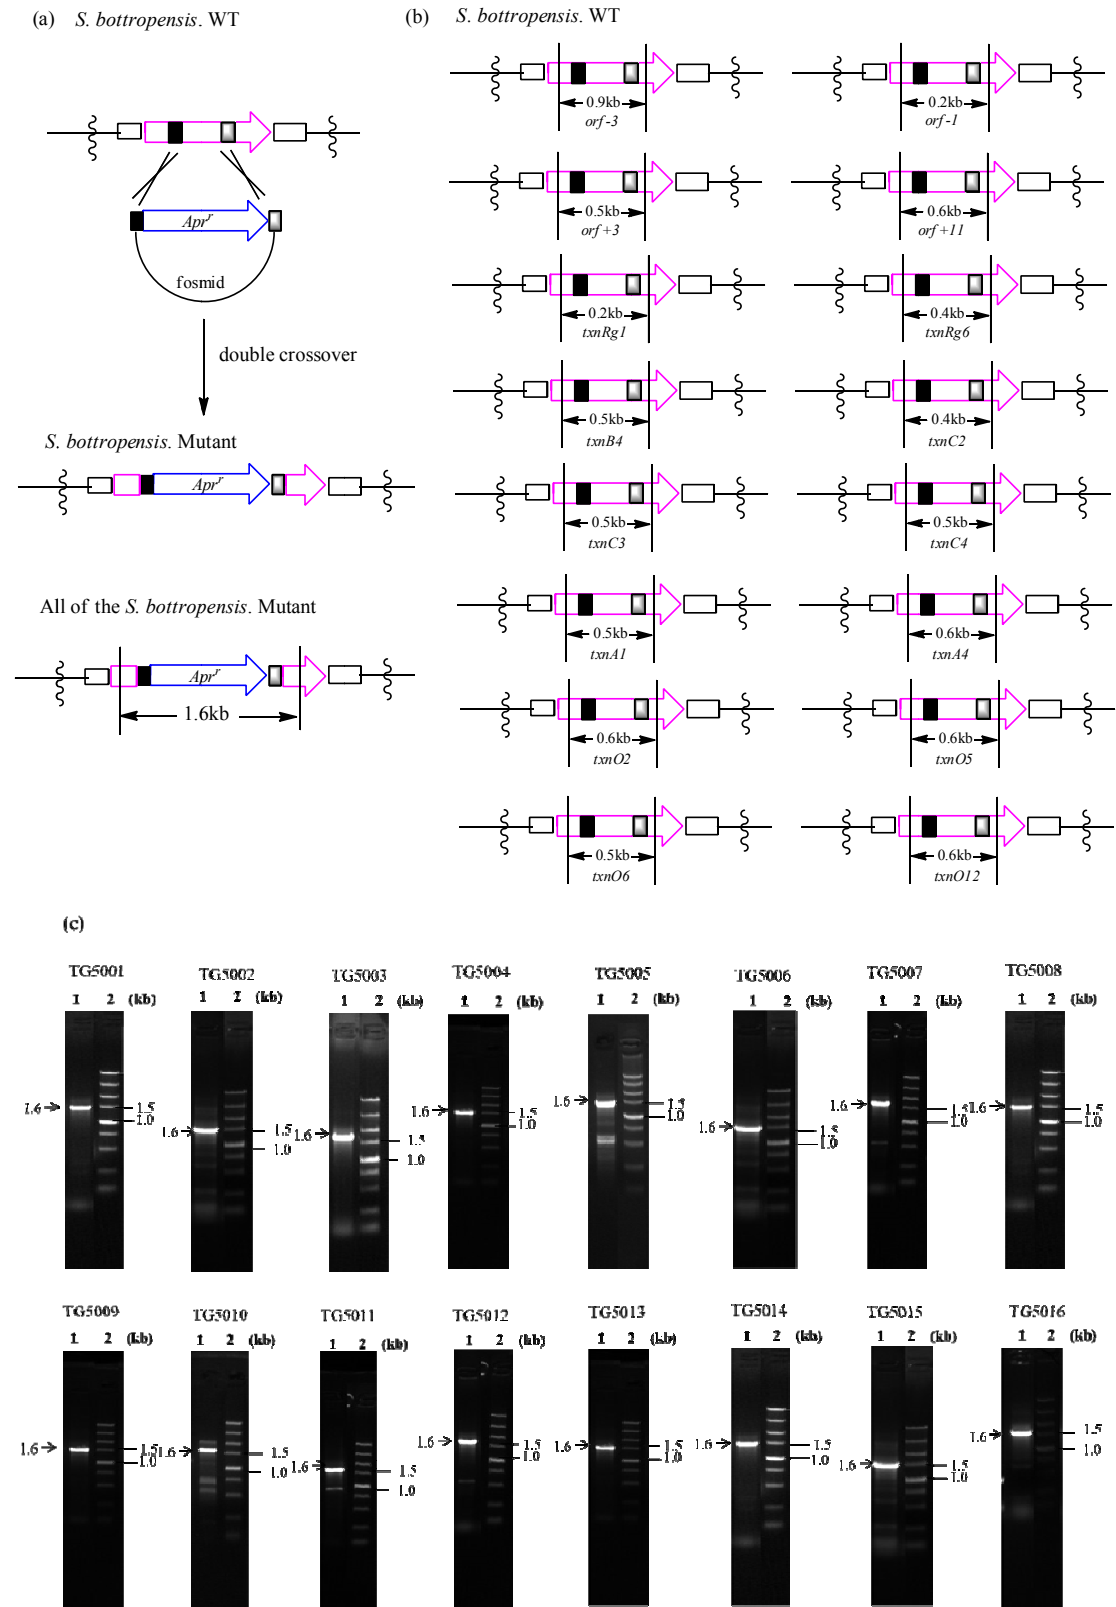

*S. sp.* TG5002 ( $\Delta orf-3$ ), *S. sp.* TG5003 ( $\Delta orf-1$ ), *S. sp.* TG5004 ( $\Delta txnRg1$ ), *S. sp.* TG5005 ( $\Delta orf+11$ ), *S. sp.* TG5006 ( $\Delta orf+3$ ), *S. sp.* TG5007 ( $\Delta txnRg6$ ), *S. sp.* TG5008 ( $\Delta txnA4$ ), *S. sp.* TG5009 ( $\Delta txnC2$ ), *S. sp.* TG5010 ( $\Delta txnC4$ ), *S. sp.* TG5011 ( $\Delta txnC3$ ), *S. sp.* TG5012 ( $\Delta txnO2$ ), *S. sp.* TG5013 ( $\Delta txnO5$ ), *S. sp.* TG5014 ( $\Delta txnO6$ ), *S. sp.* TG5015 ( $\Delta txnO12$ ), and *S. sp.* TG5016 ( $\Delta txnB4$ ) were extracted and tested by PCR analysis, respectively. A 1.6-kb (spectinomycin resistance gene fragment) band can be amplified from all of the mutants with specific primers. Wild type for *orf-3*, *orf-1*, *orf+3*, *orf+11*, *txnRg1*, *txnRg6*, *txnB4*, *txnC2*, *txnC3*, *txnC4*, *txnA1*, *txnA4*, *txnO2*, *txnO5*, *txnO6*, *txnO12* gene the corresponding PCR products is 0.9-kb, 0.2-kb, 0.5-kb, 0.6-kb, 0.2-kb, 0.4-kb, 0.5-kb, 0.4-kb, 0.5-kb, 0.5-kb, 0.5-kb, 0.6-kb, 0.6-kb, 0.6-kb, 0.5-kb and 0.6-kb, respectively). Lane 1, *Streptomyces* mutant strain; Lane 2 DNA marker.

Fig. S3  $^1\text{H-NMR}$  spectrum of compound **4a** in  $\text{CD}_3\text{OD}$

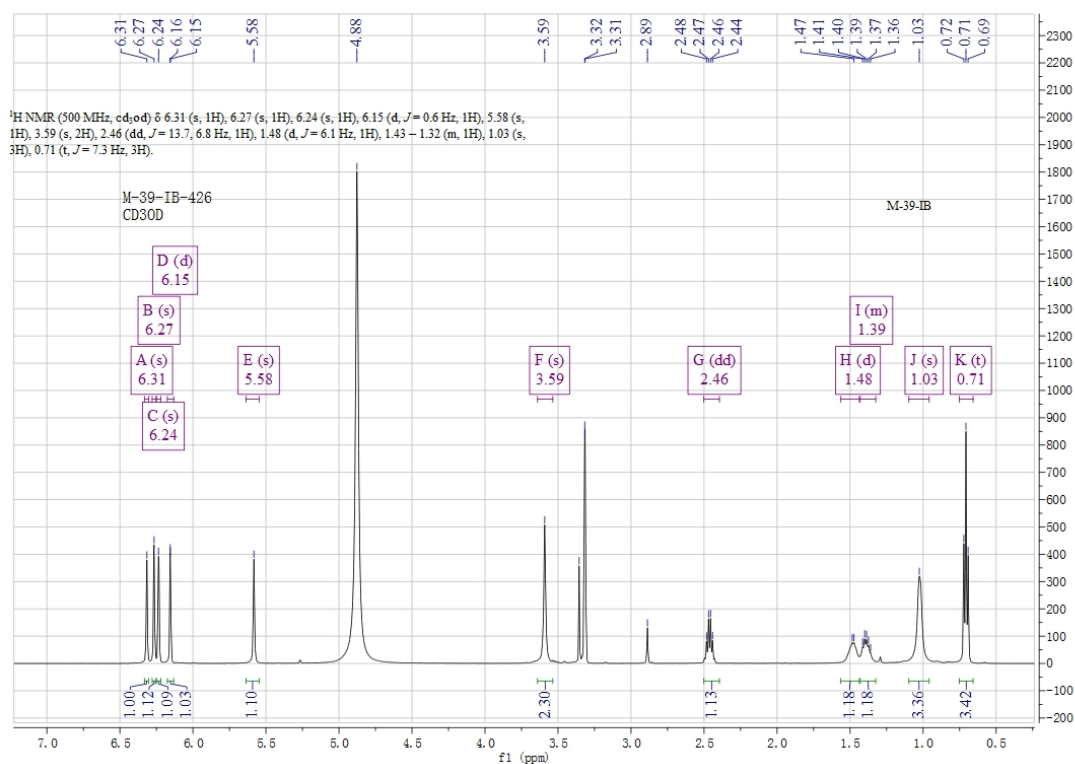

Fig. S4  $^{13}\text{C}$ -NMR spectrum of compound **4a** in  $\text{CD}_3\text{OD}$

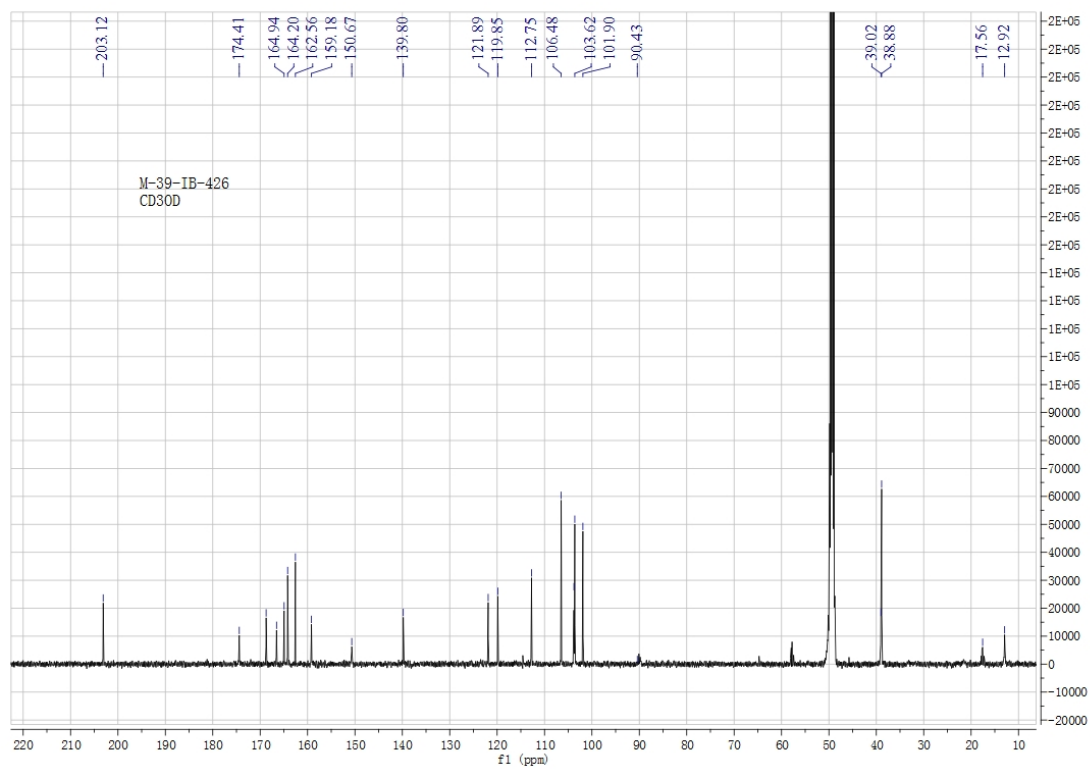

Fig. S5  $^1\text{H}$ - $^1\text{H}$  COSY spectrum of compound **4a** in  $\text{CD}_3\text{OD}$

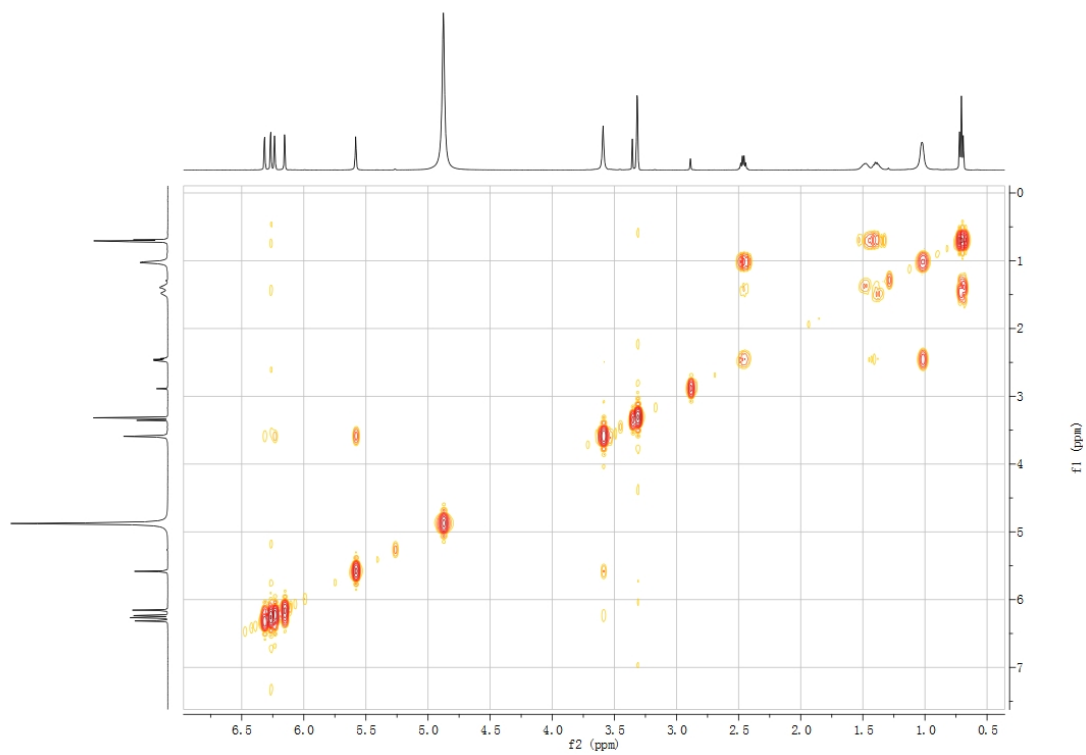

Fig. S6 HSQC NMR spectrum of compound **4a** in CD<sub>3</sub>OD

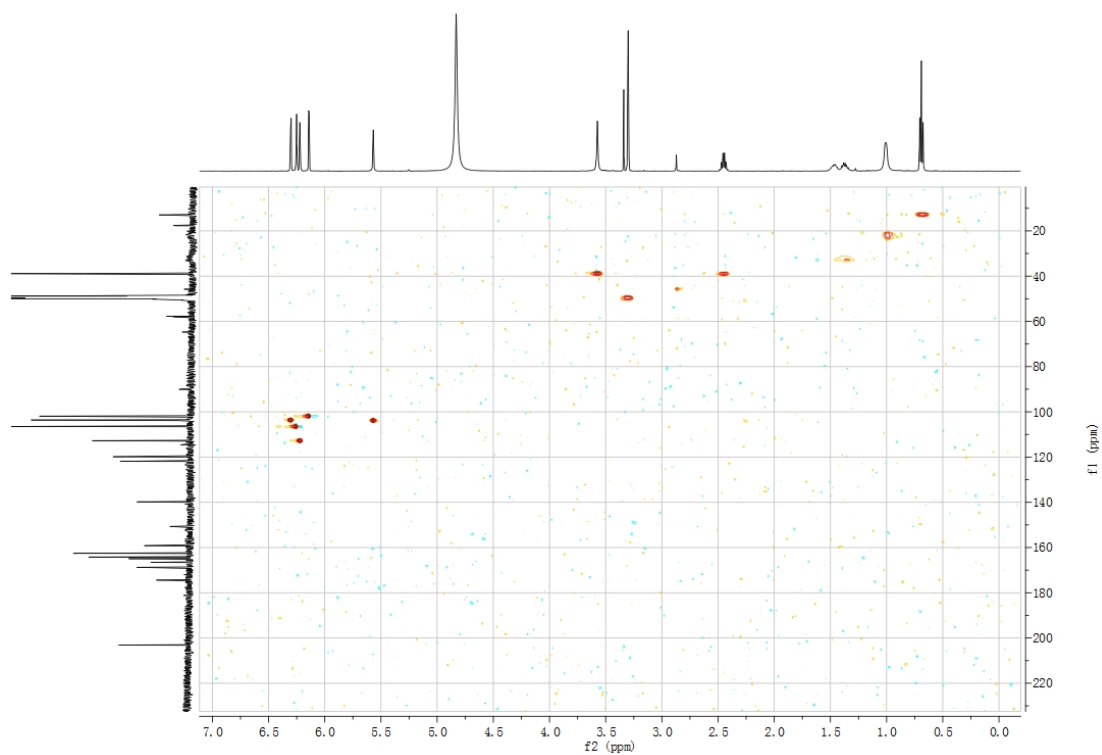

Fig. S7 HMBC NMR spectrum of compound **4a** in CD<sub>3</sub>OD

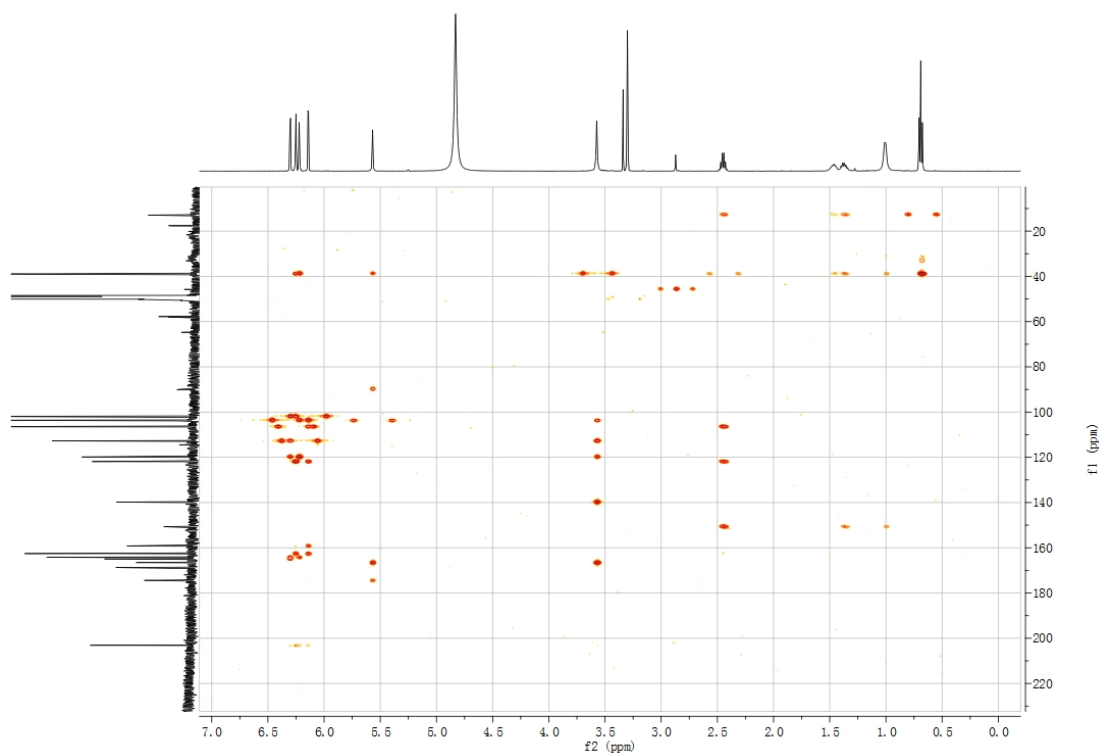

Fig. S8  $^1\text{H-NMR}$  spectrum of compound **4b** in  $\text{CD}_3\text{OD}$

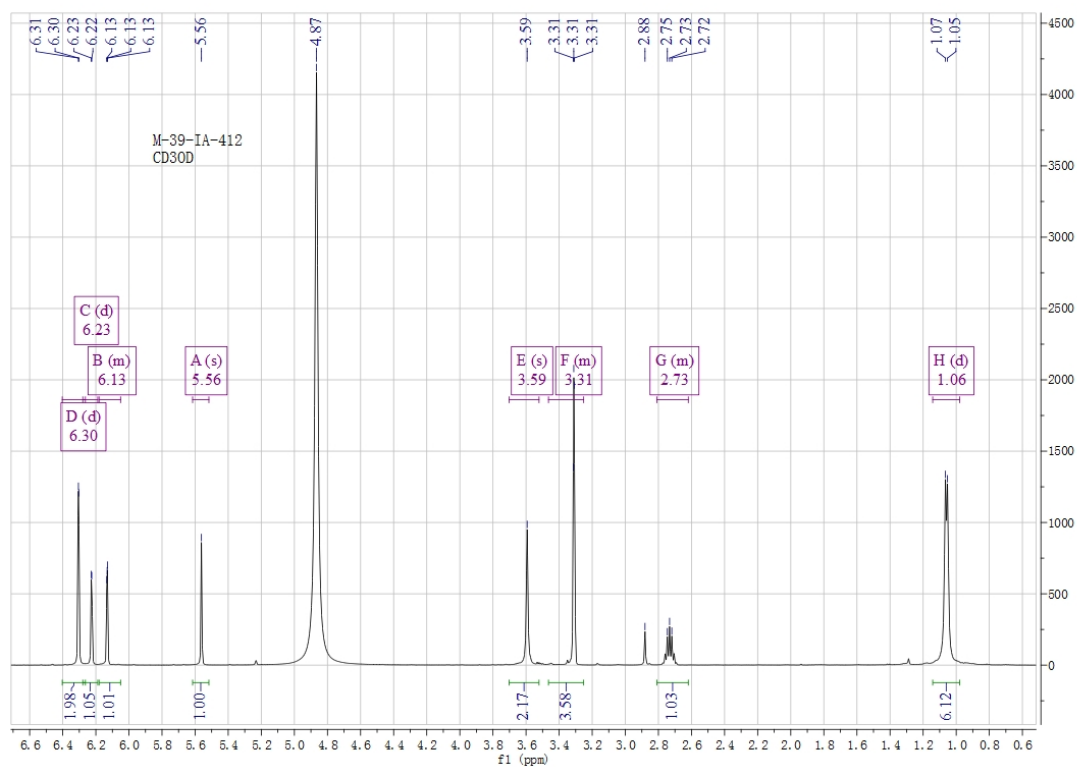

Fig. S9  $^{13}\text{C-NMR}$  spectrum of compound **4b** in  $\text{CD}_3\text{OD}$

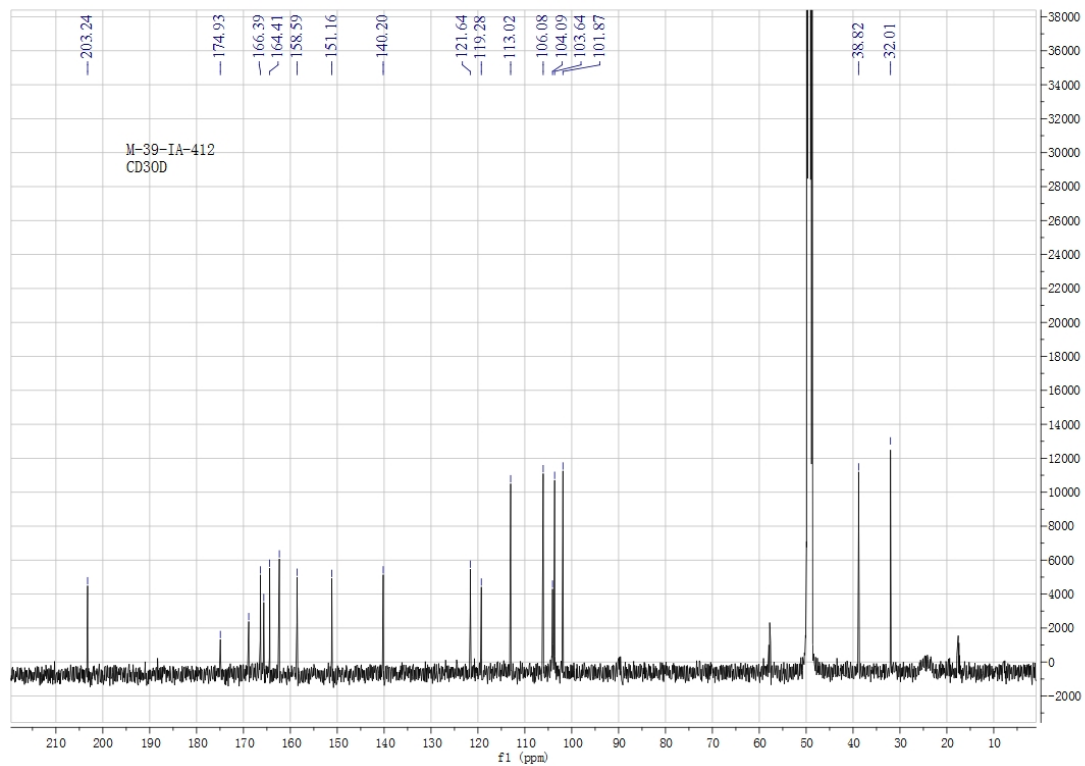

Fig. S10  $^1\text{H}$ - $^1\text{H}$  COSY spectrum of compound **4b** in  $\text{CD}_3\text{OD}$

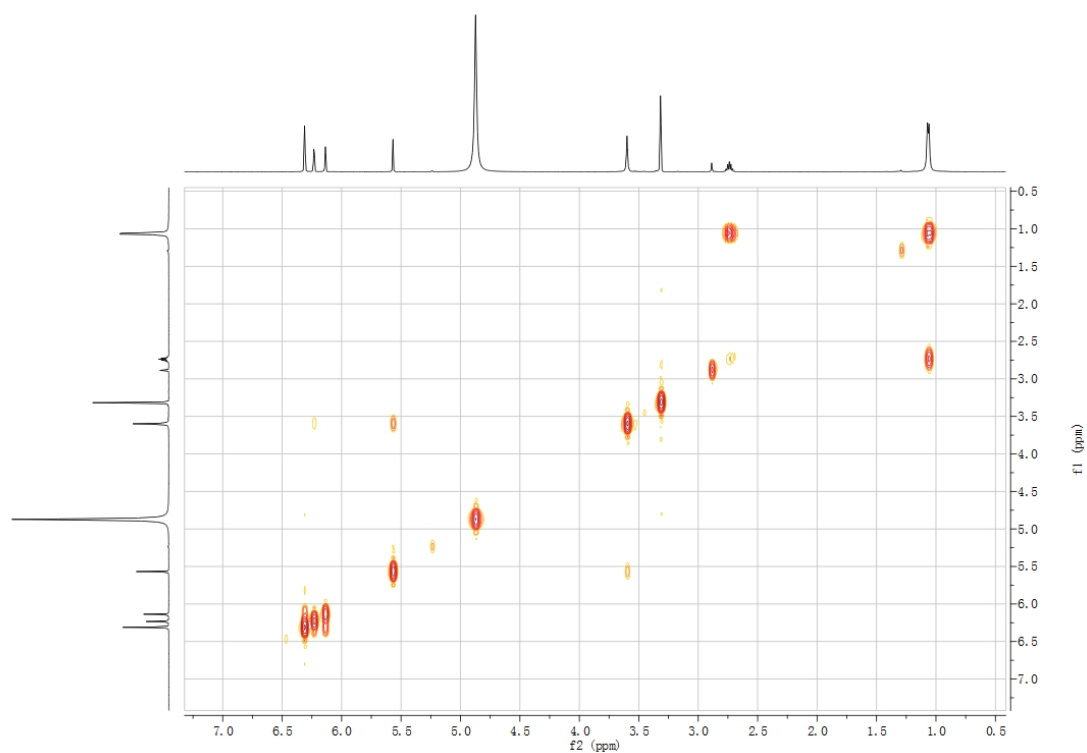

Fig. S11 HSQC NMR spectrum of compound **4b** in  $\text{CD}_3\text{OD}$

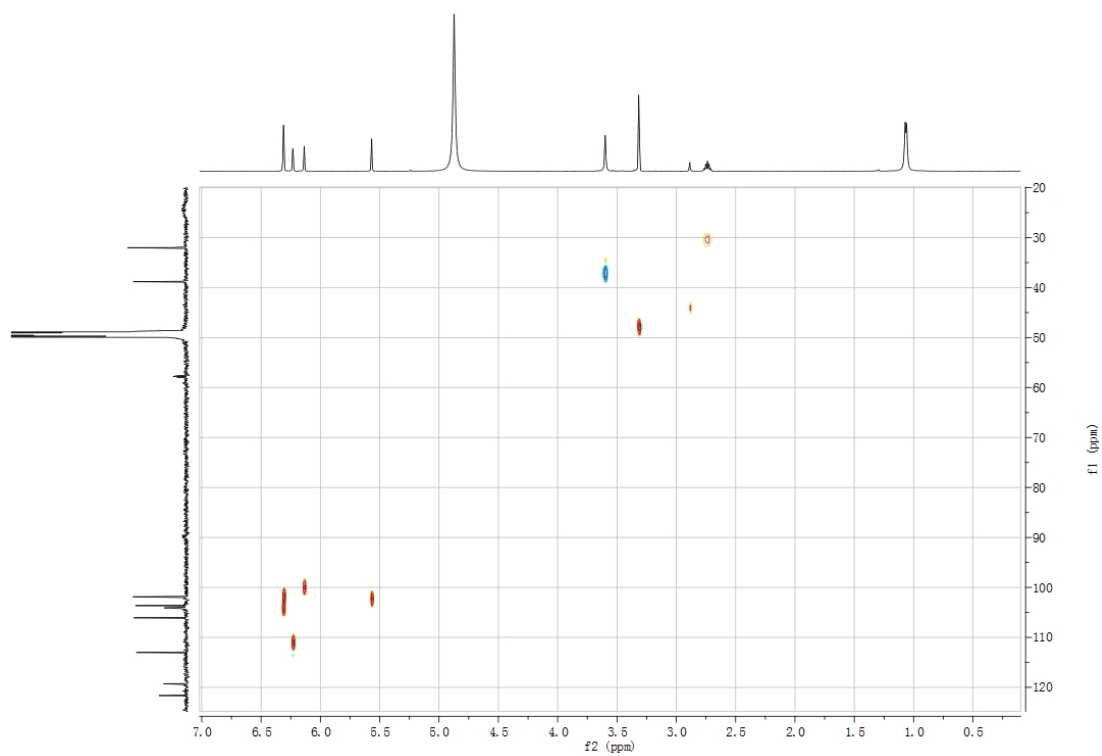

Fig. S12 HMBC NMR spectrum of compound **4b** in CD<sub>3</sub>OD

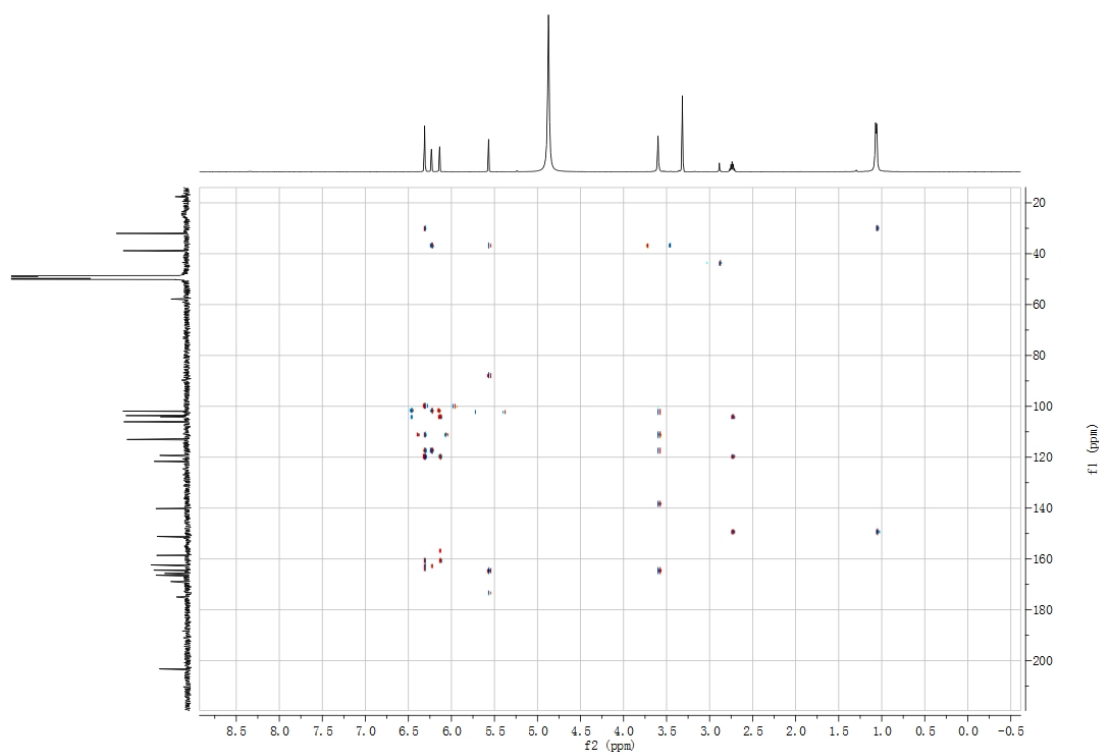

Fig. S13 <sup>1</sup>H-NMR spectrum of compound **6a** in CDCl<sub>3</sub>

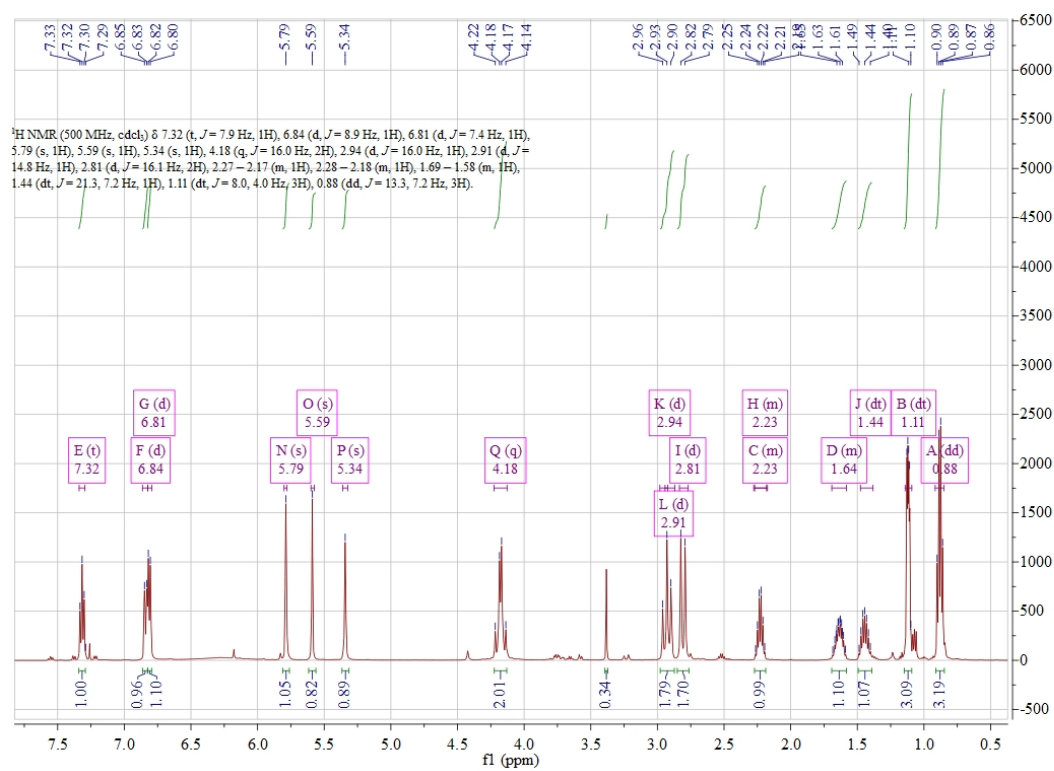

Fig. S14  $^{13}\text{C}$ -NMR spectrum of compound **6a** in  $\text{CDCl}_3$

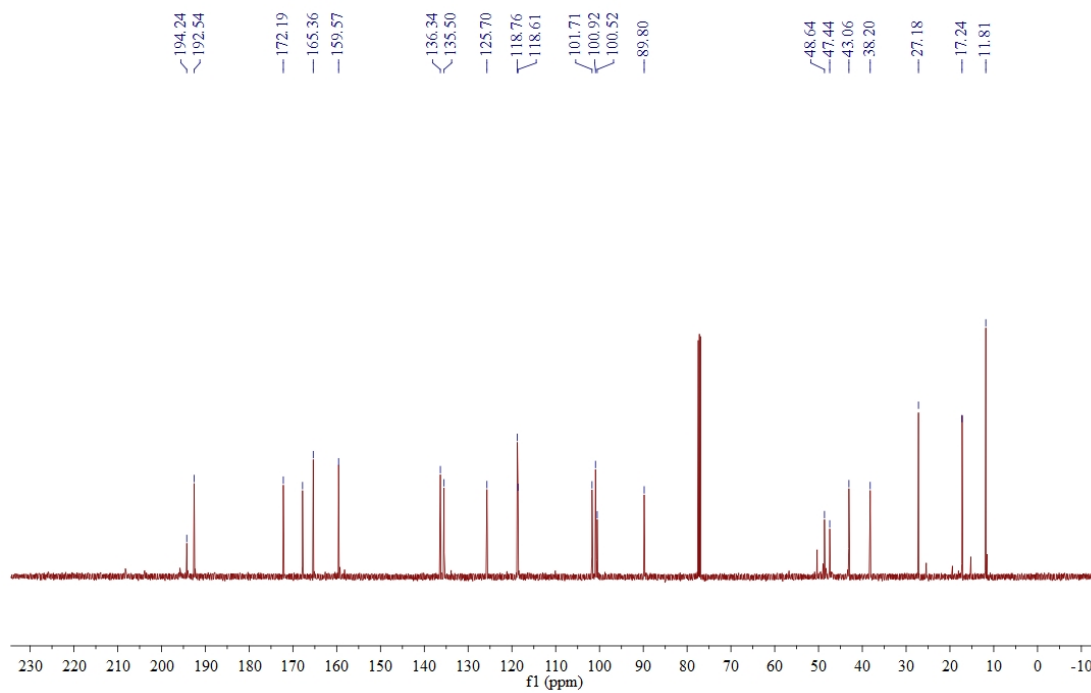

Fig. S15  $^1\text{H}$ - $^1\text{H}$  COSY spectrum of compound **6a** in  $\text{CDCl}_3$

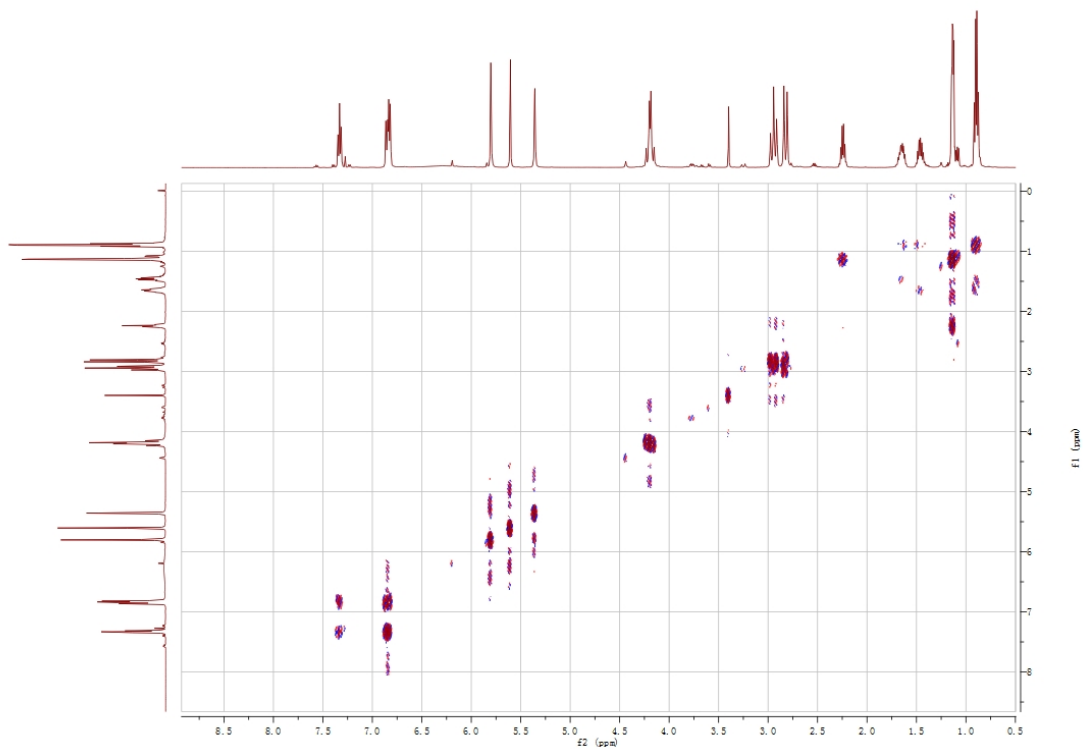



Fig. S16 HSQC NMR spectrum of compound **6a** in CDCl<sub>3</sub>

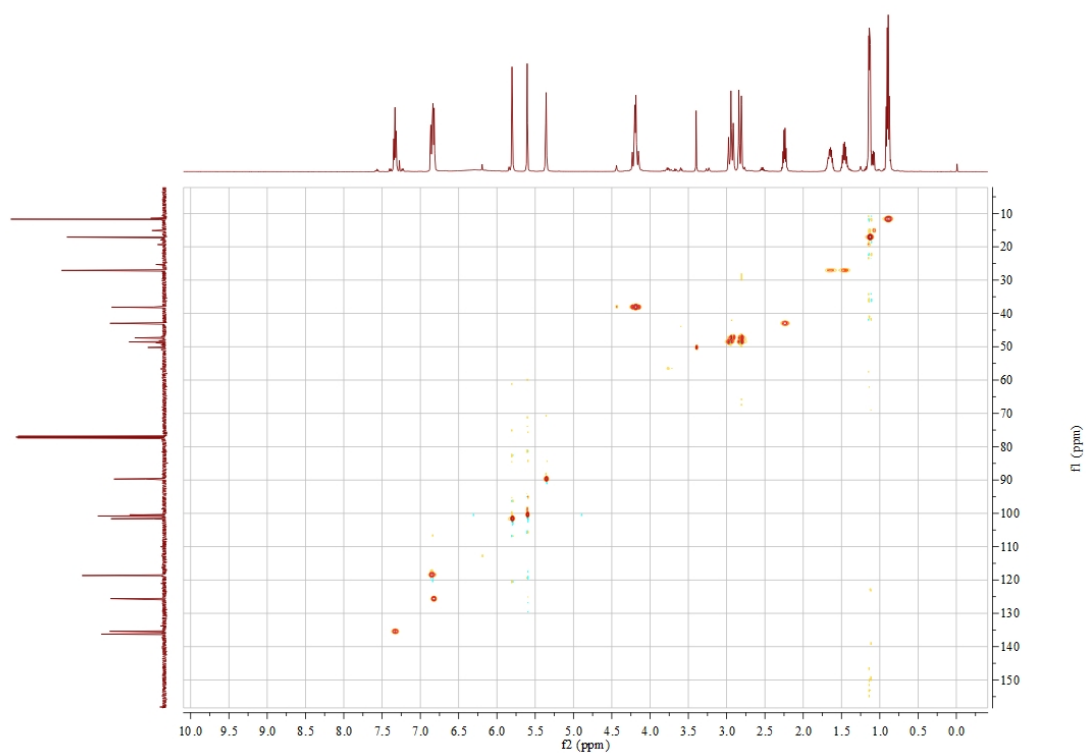

Fig. S17 HMBC NMR spectrum of compound **6a** in CDCl<sub>3</sub>

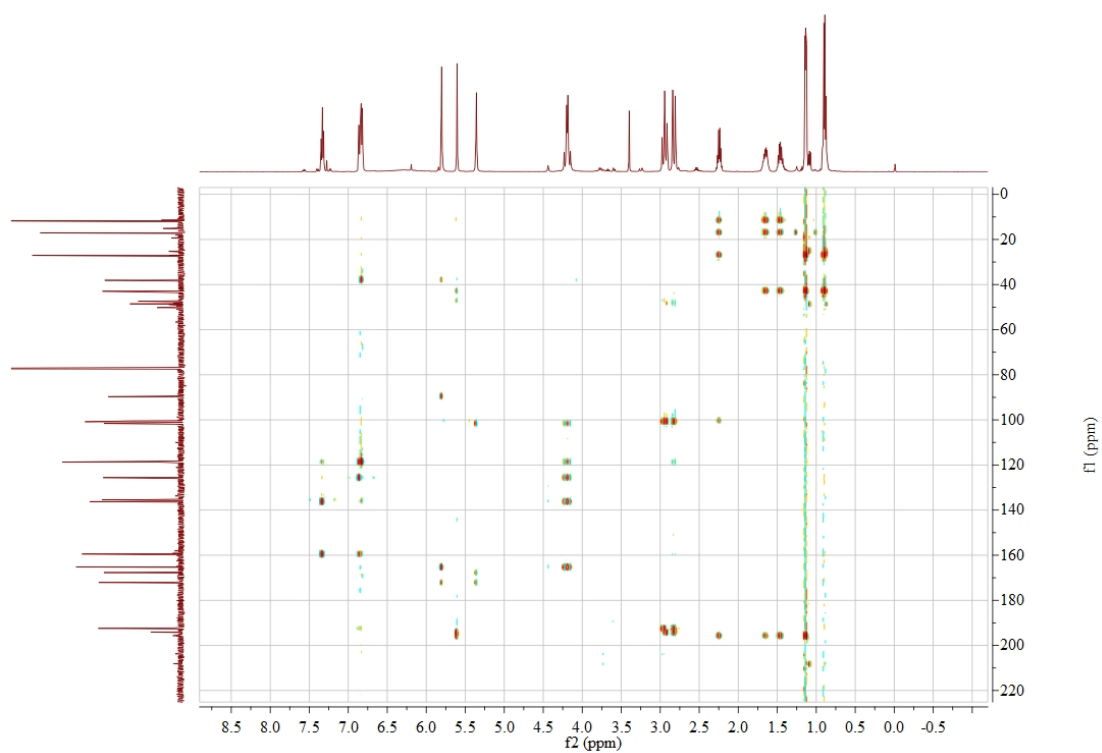

Fig. S18 <sup>1</sup>H-NMR spectrum of compound **9a** in DMSO-d<sub>6</sub>

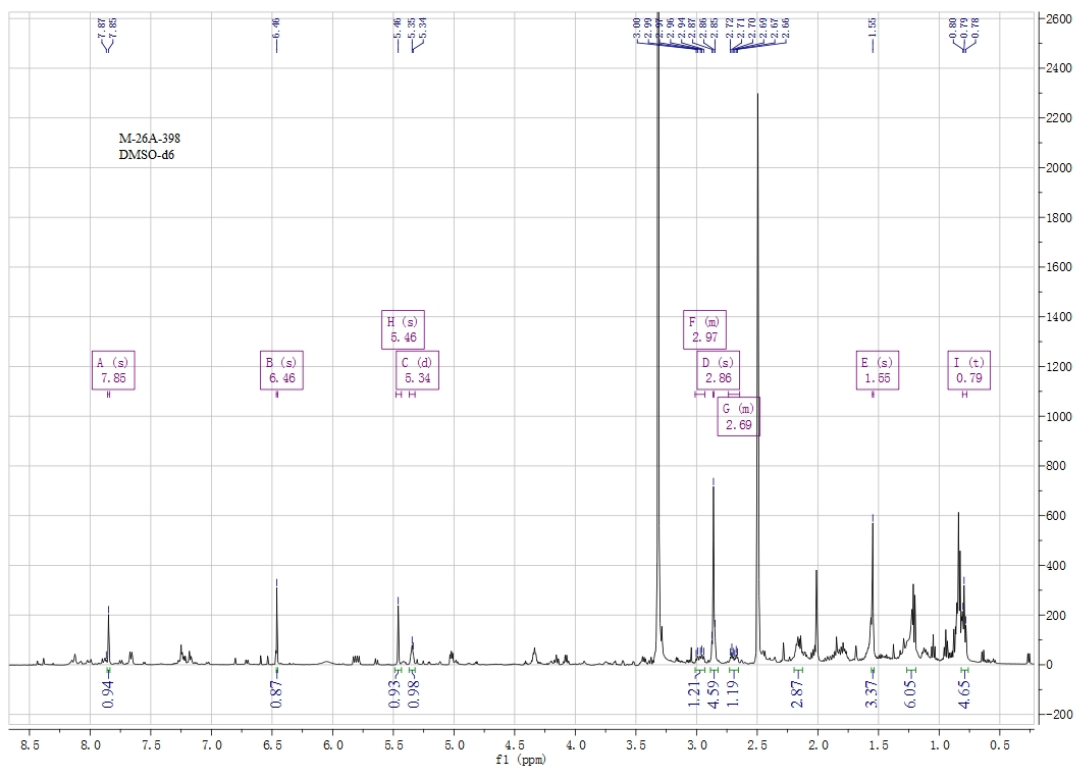

Fig. S19 <sup>13</sup>C-NMR spectrum of compound **9a** in DMSO-d<sub>6</sub>

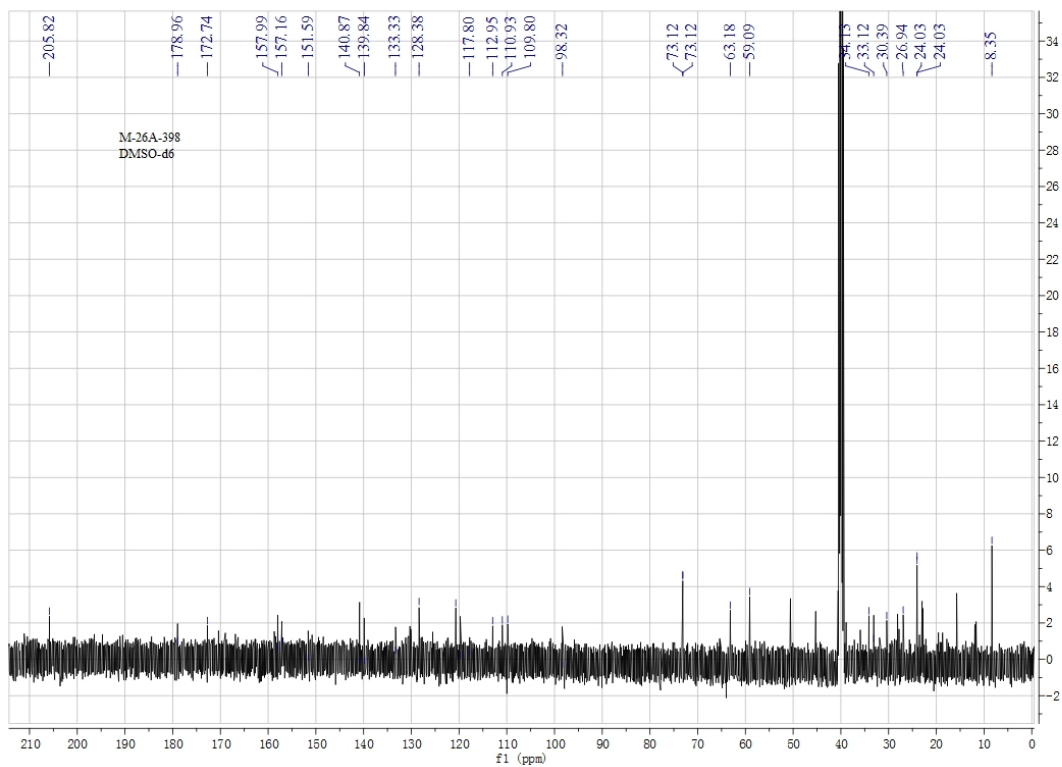

Fig. S20 HSQC NMR spectrum of compound **9a** in DMSO-d6

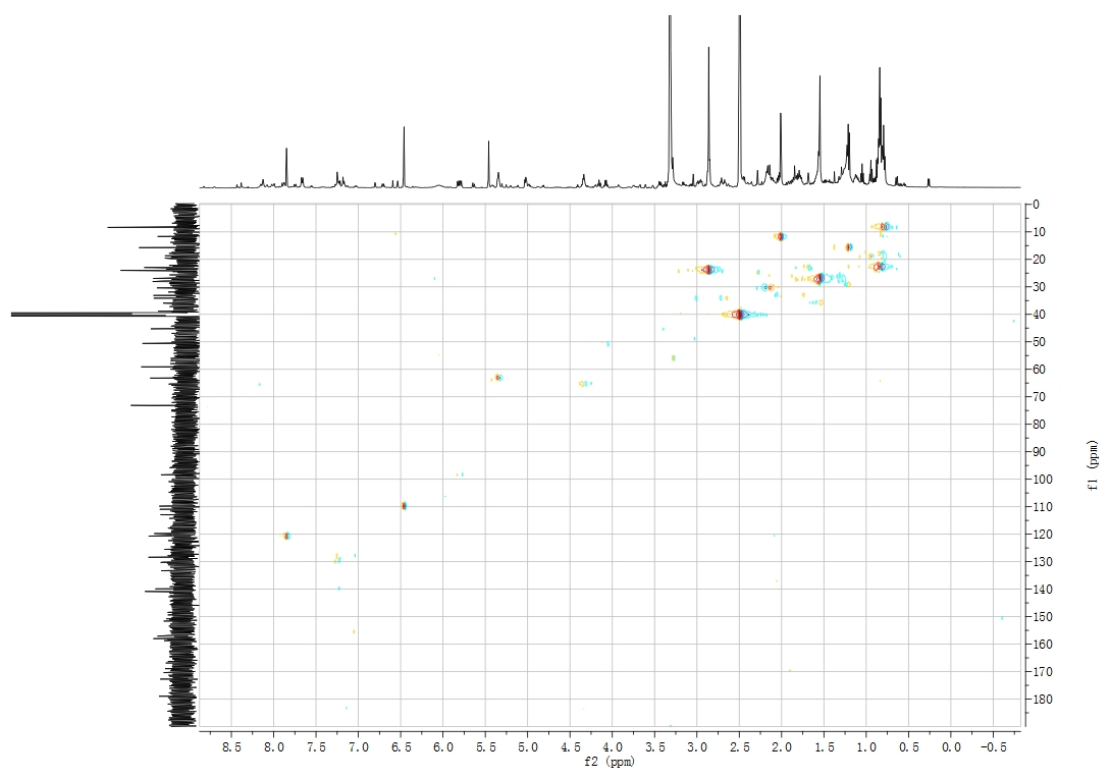

Fig. S21 HMBC NMR spectrum of compound **9a** in DMSO-d6

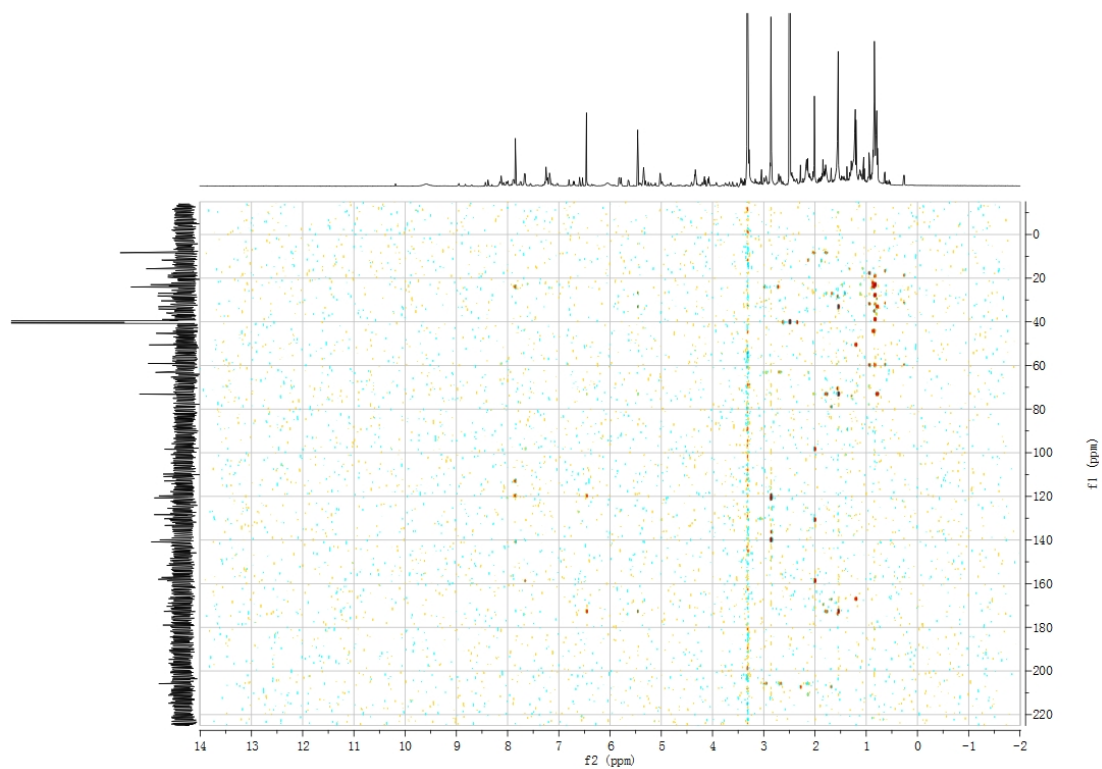

Fig. S22  $^1\text{H}$ -NMR spectrum of compound **12a** in  $\text{CDCl}_3$

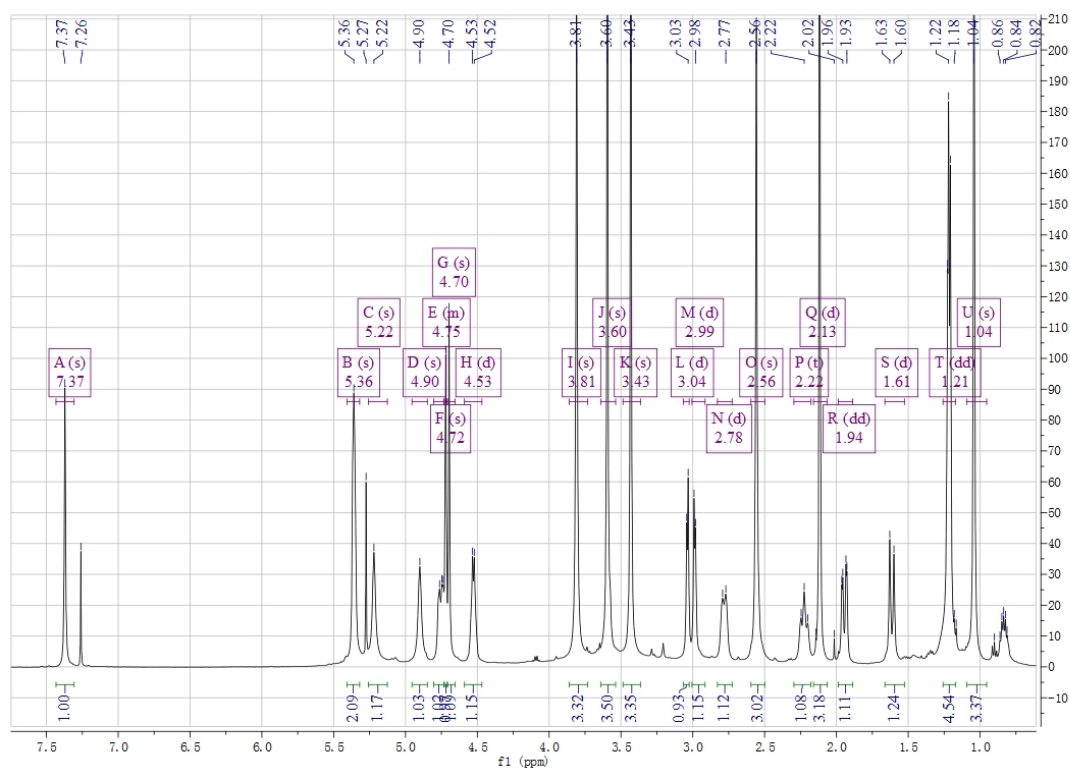

Fig. S23  $^{13}\text{C}$ -NMR spectrum of compound **12a** in  $\text{CDCl}_3$

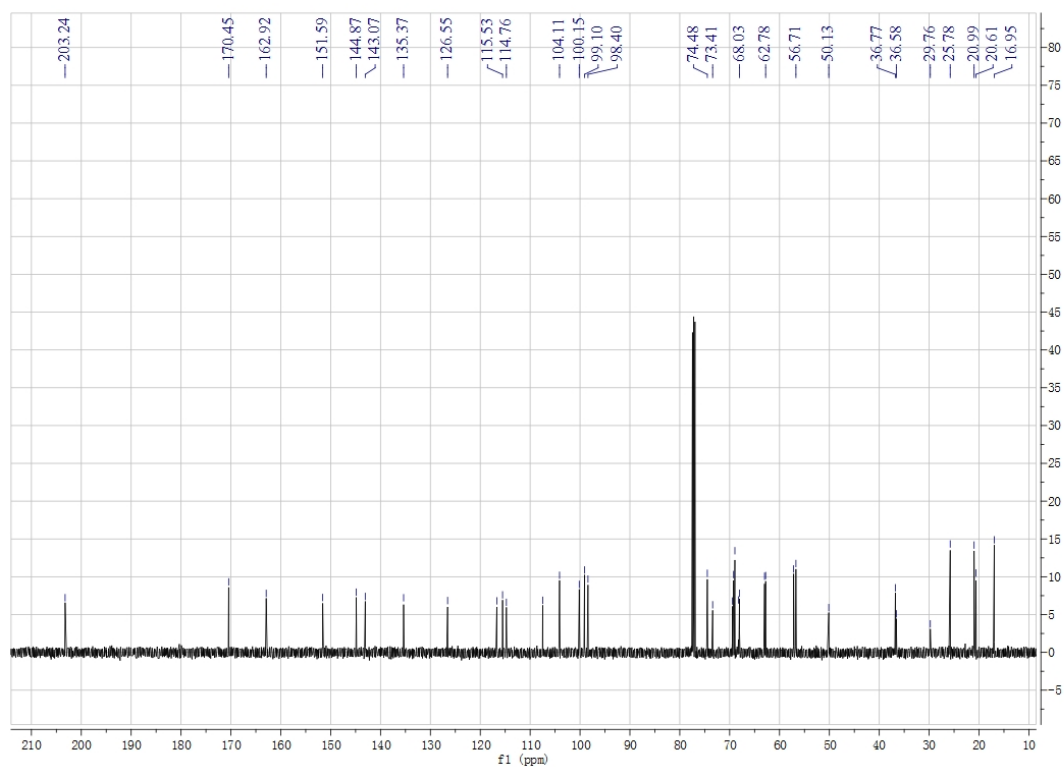

Fig. S24 HSQC NMR spectrum of compound **12a** in CDCl<sub>3</sub>

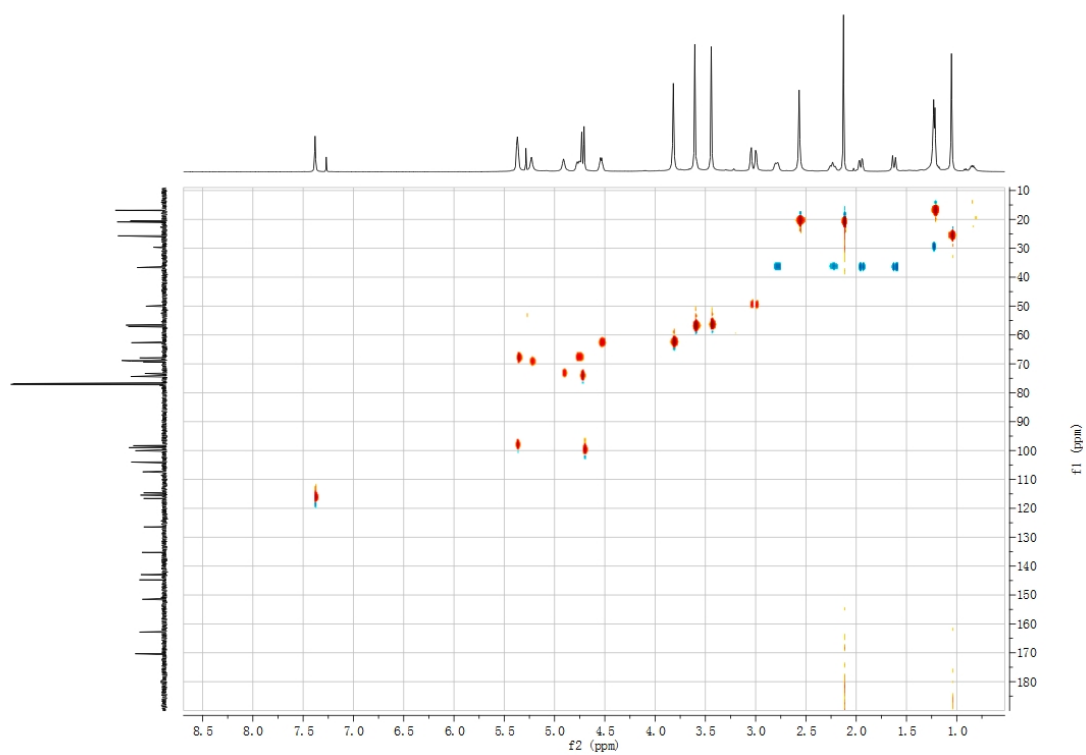

Fig. S25 HMBC NMR spectrum of compound **12a** in CDCl<sub>3</sub>

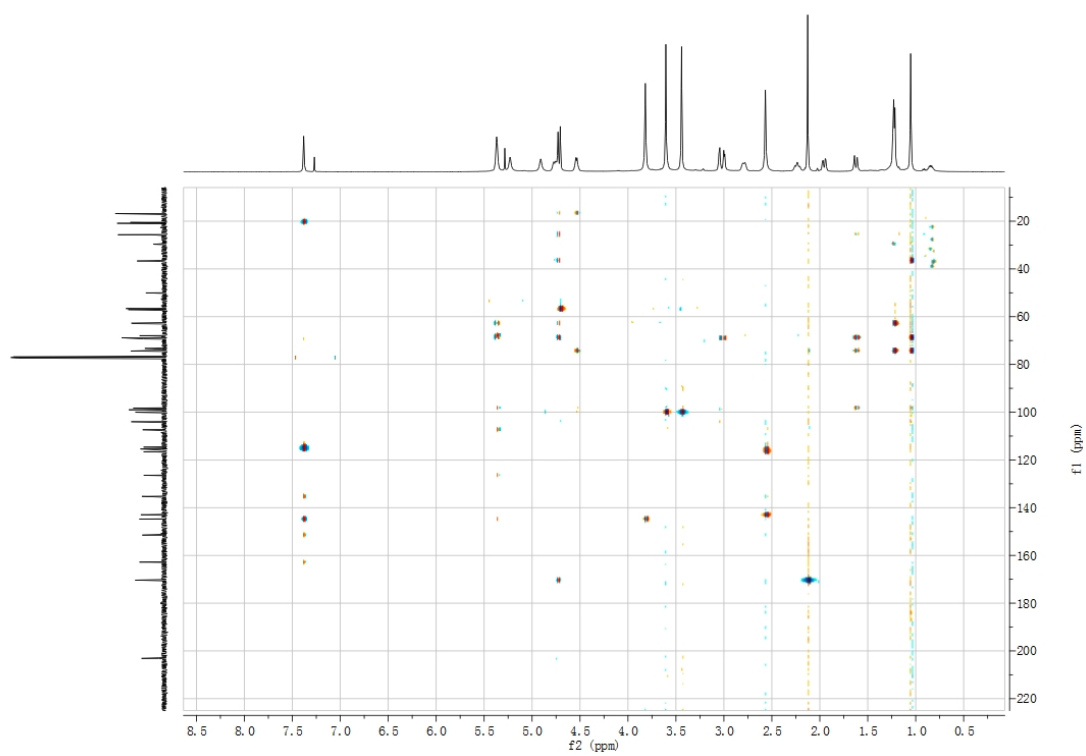

Fig. S26 <sup>1</sup>H-NMR spectrum of compound **12b** in CDCl<sub>3</sub>

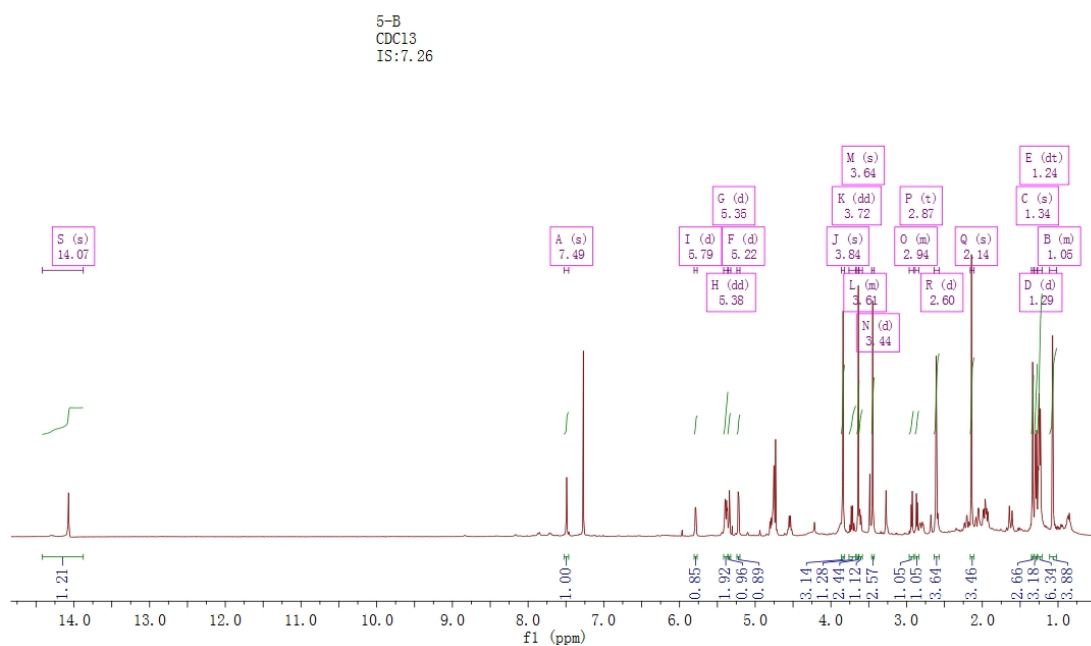

Fig. S27 <sup>13</sup>C-NMR spectrum of compound **12b** in CDCl<sub>3</sub>

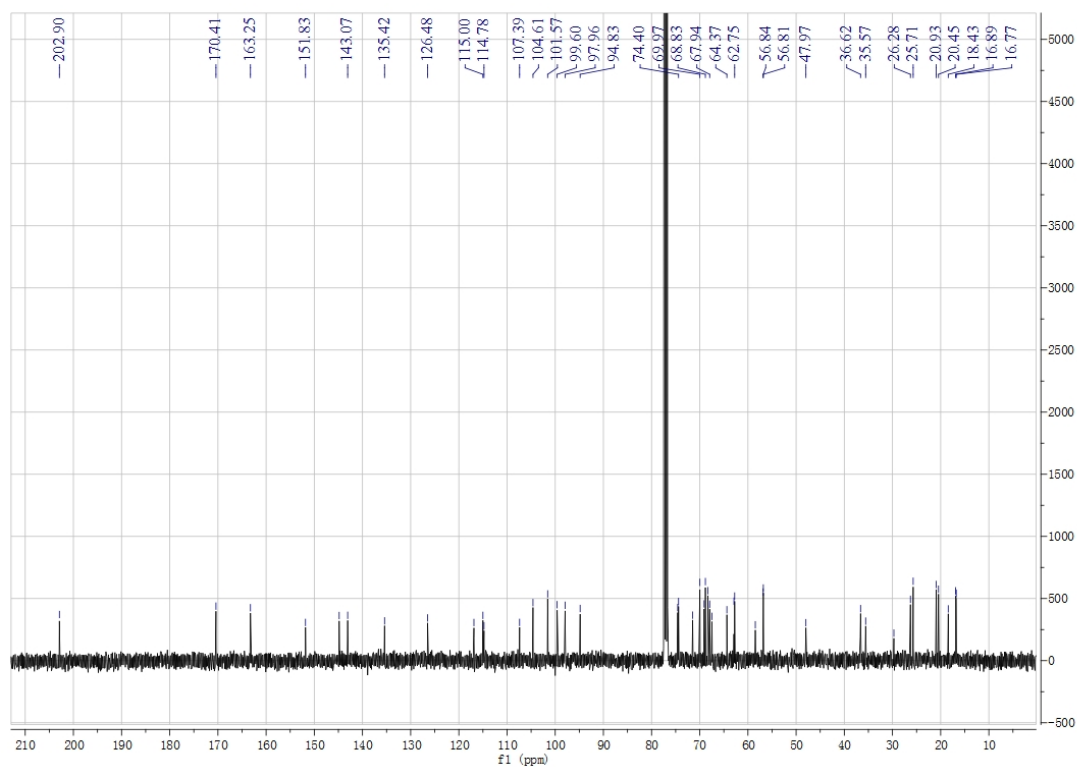

Fig. S28  $^1\text{H-NMR}$  spectrum of compound **13a** in  $\text{CD}_3\text{OD}$

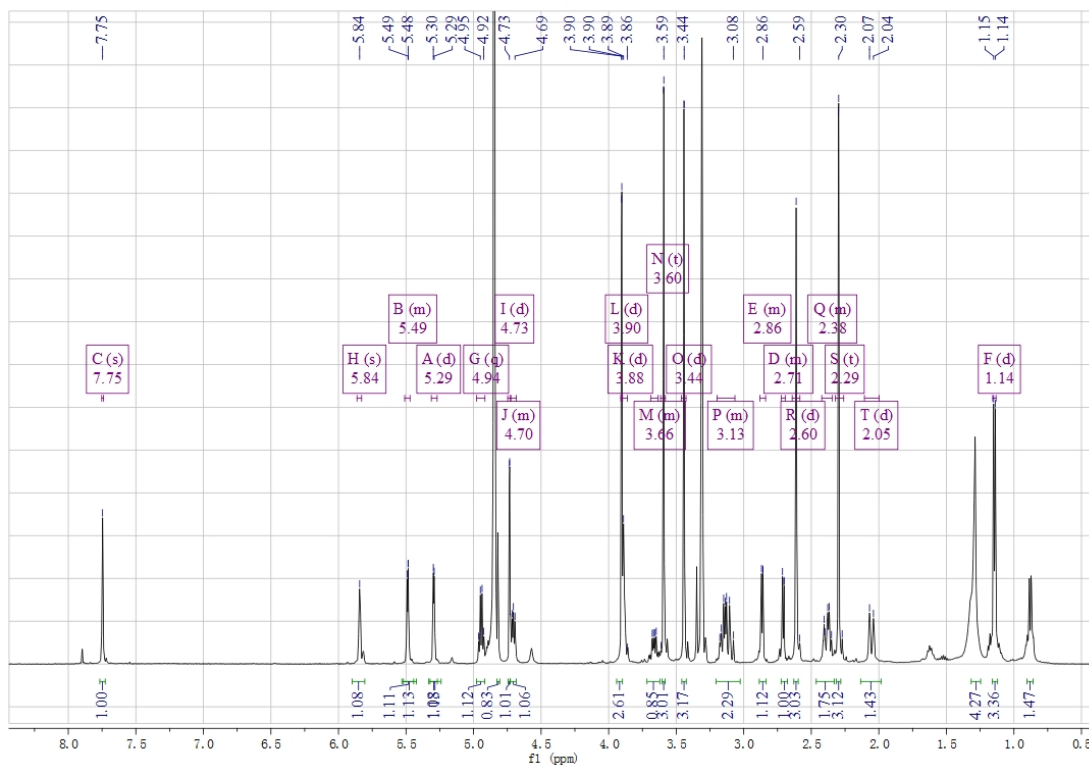

Fig. S29  $^{13}\text{C-NMR}$  spectrum of compound **13a** in  $\text{CD}_3\text{OD}$

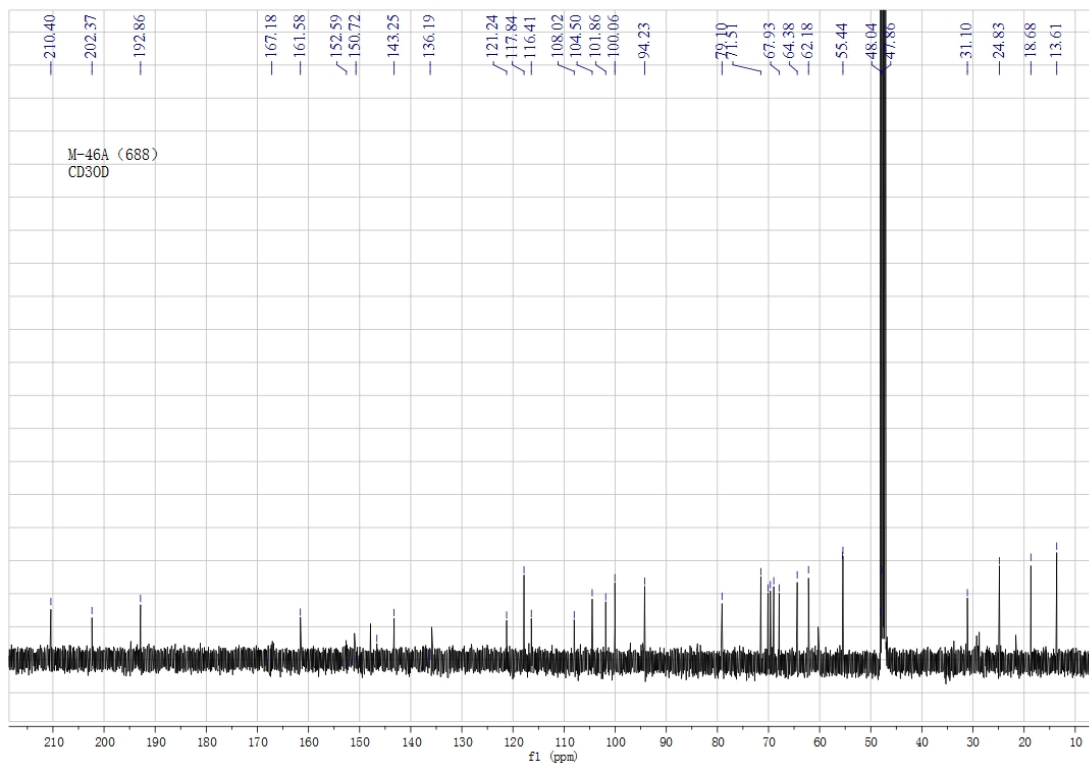

Fig. S30 HSQC NMR spectrum of compound **13a** in CD<sub>3</sub>OD

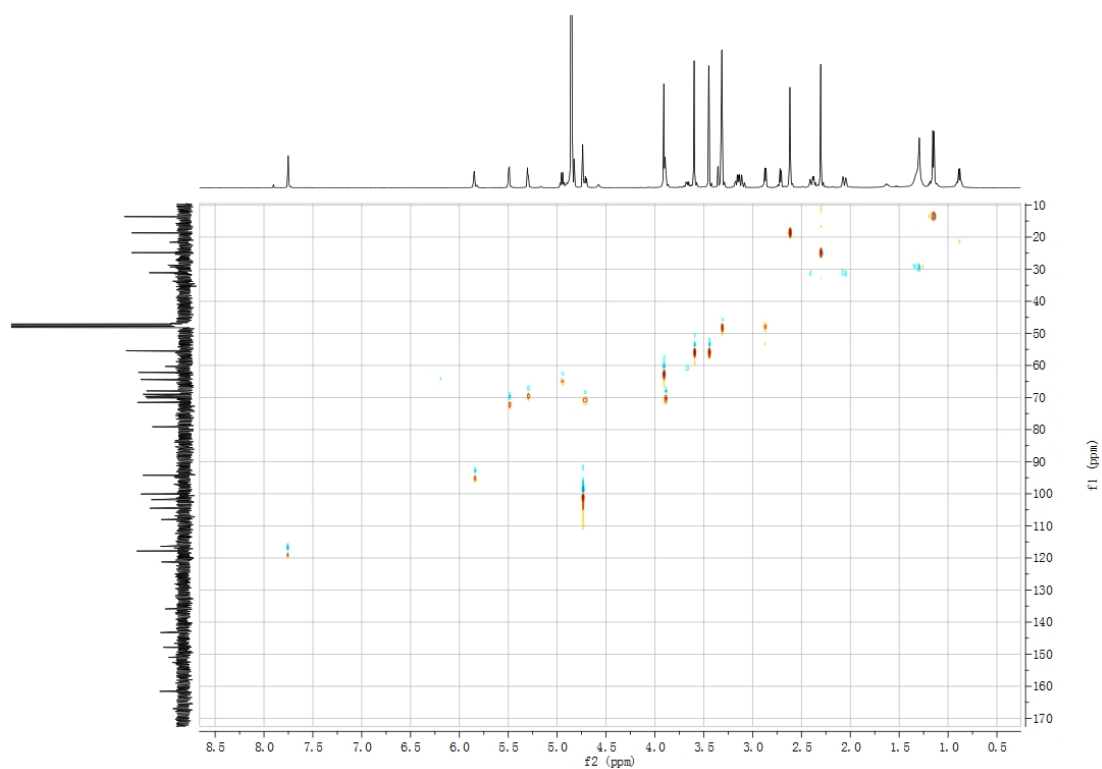

Fig. S31 HMBC NMR spectrum of compound **13a** in CD<sub>3</sub>OD

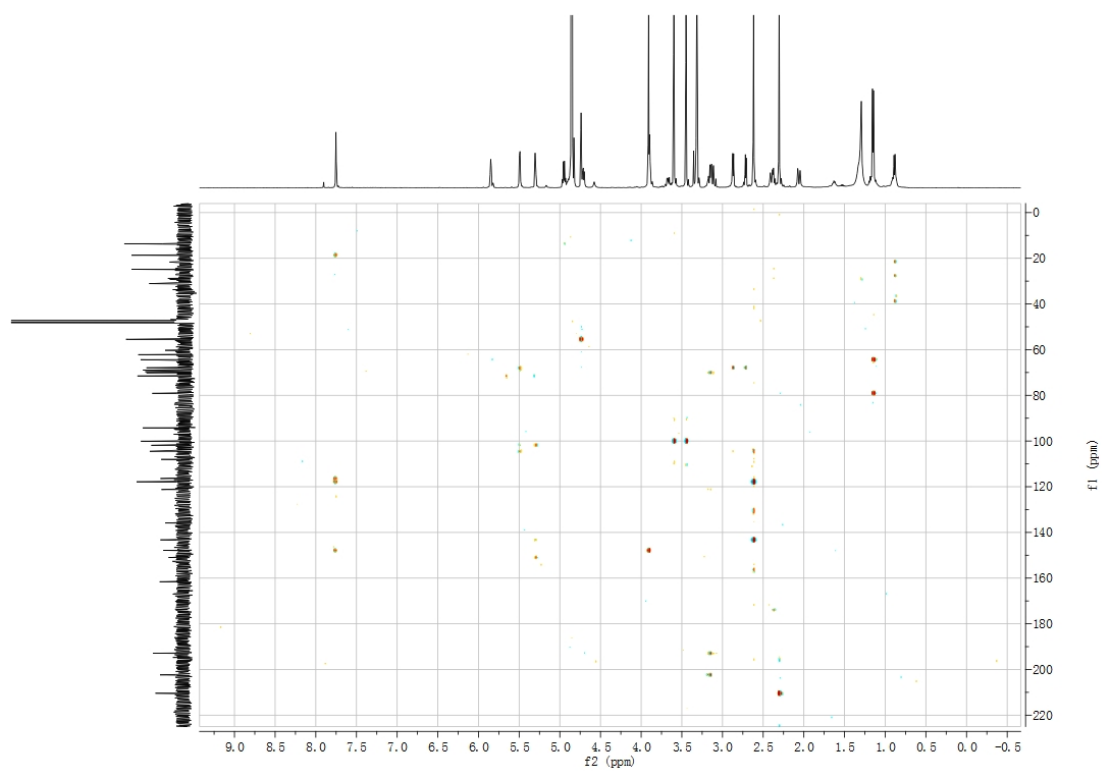



Fig. S32  $^1\text{H-NMR}$  spectrum of compound **13b** in  $\text{CD}_3\text{OD}$

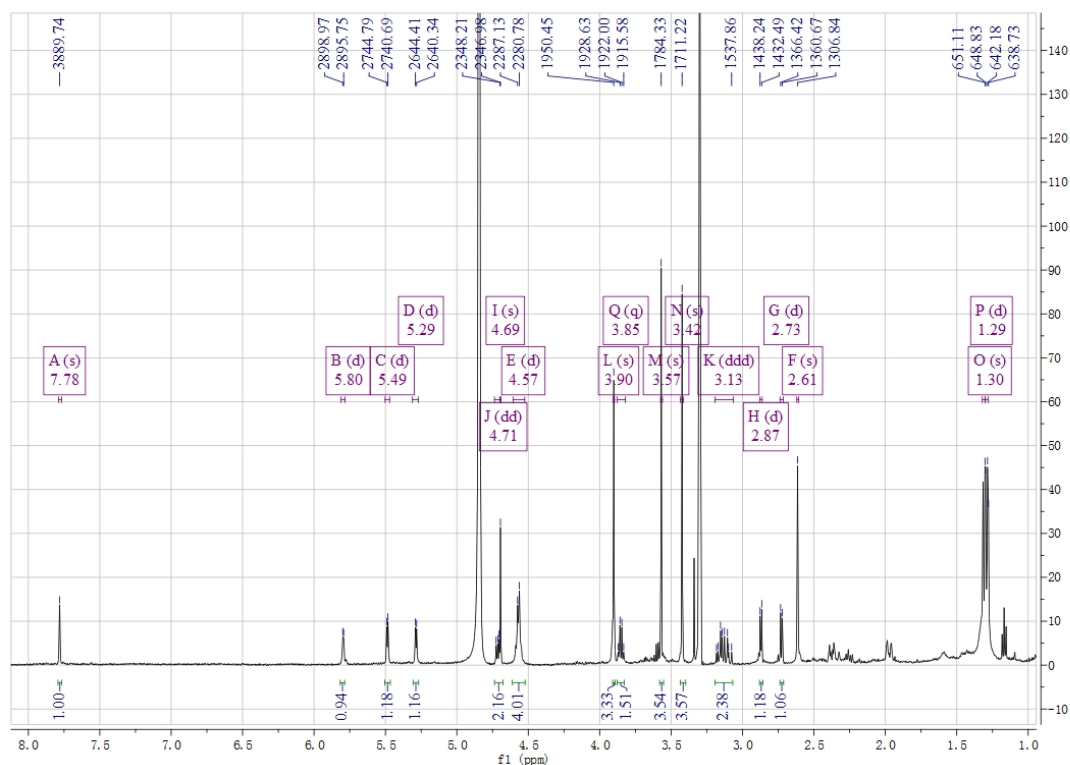

Fig. S33  $^1\text{H-NMR}$  spectrum of compound **14a** in  $\text{CDCl}_3$

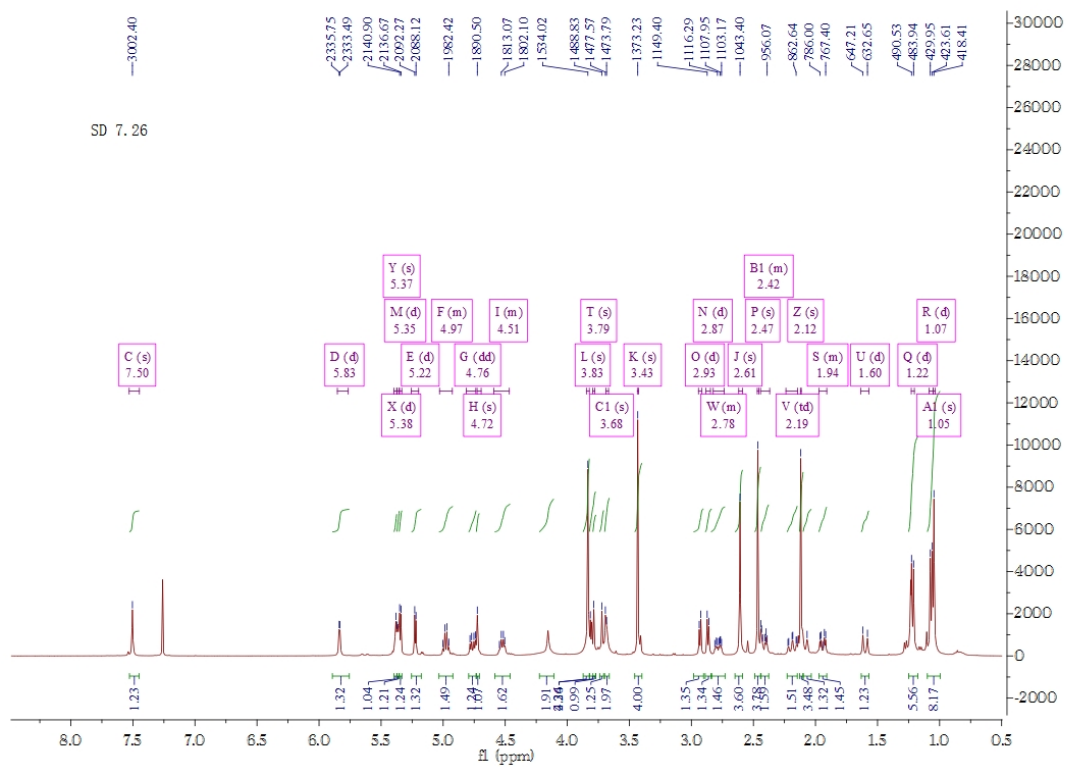

Fig. S34  $^{13}\text{C}$ -NMR spectrum of compound **14a** in  $\text{CDCl}_3$

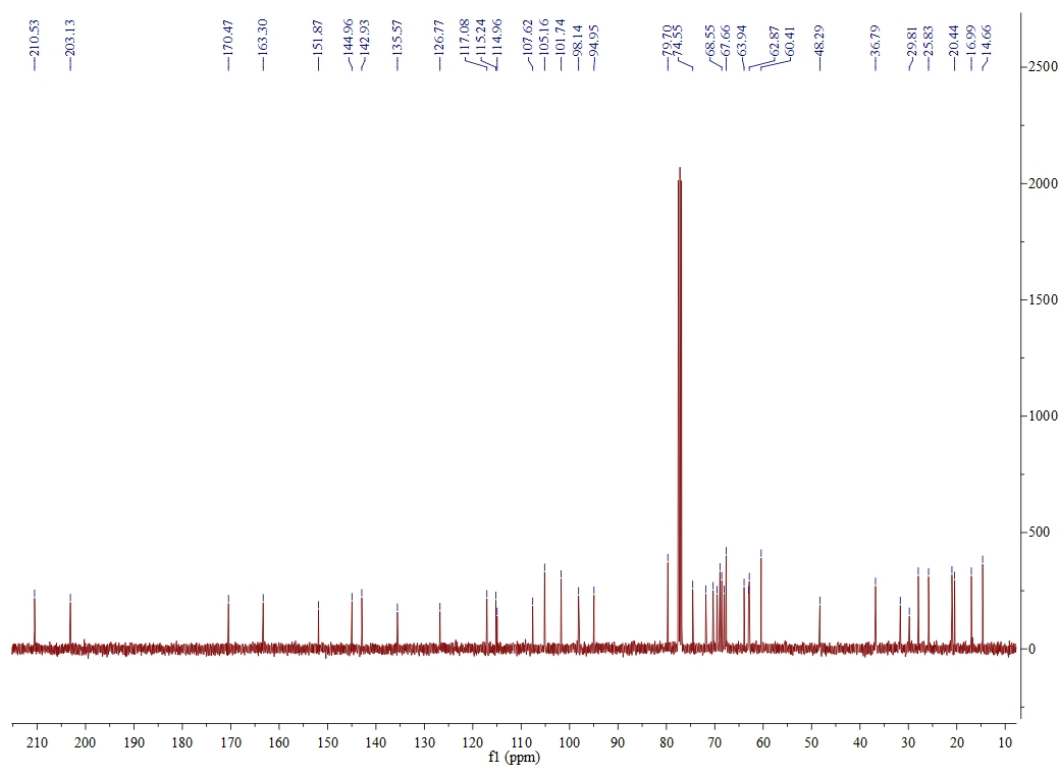

Fig. S35 HSQC NMR spectrum of compound **14a** in  $\text{CDCl}_3$

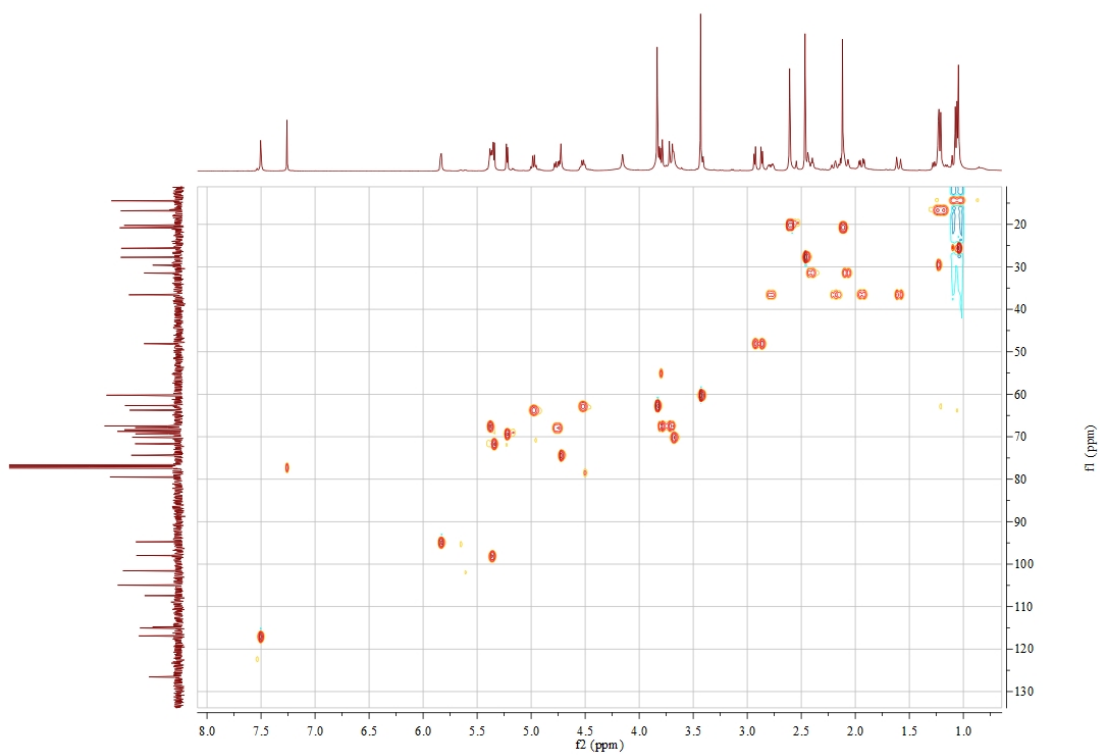

Fig. S36  $^1\text{H}$ - $^1\text{H}$  COSY spectrum of compound **14a** in  $\text{CDCl}_3$

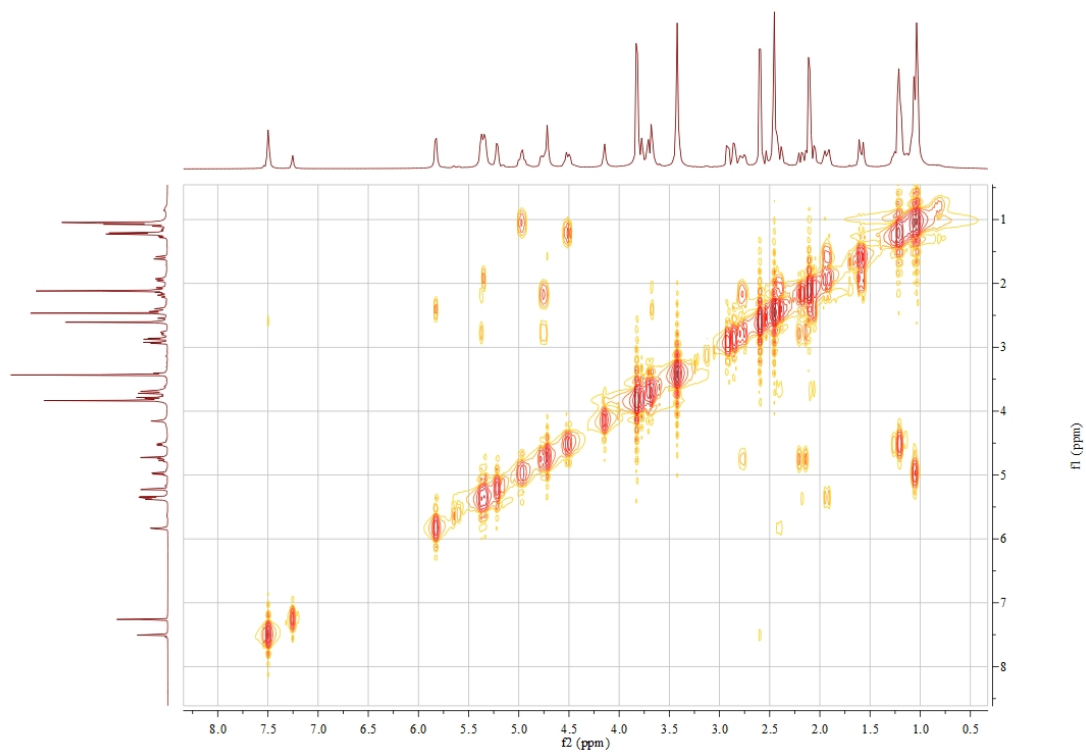

Fig. S37 HMBC NMR spectrum of compound **14a** in  $\text{CDCl}_3$

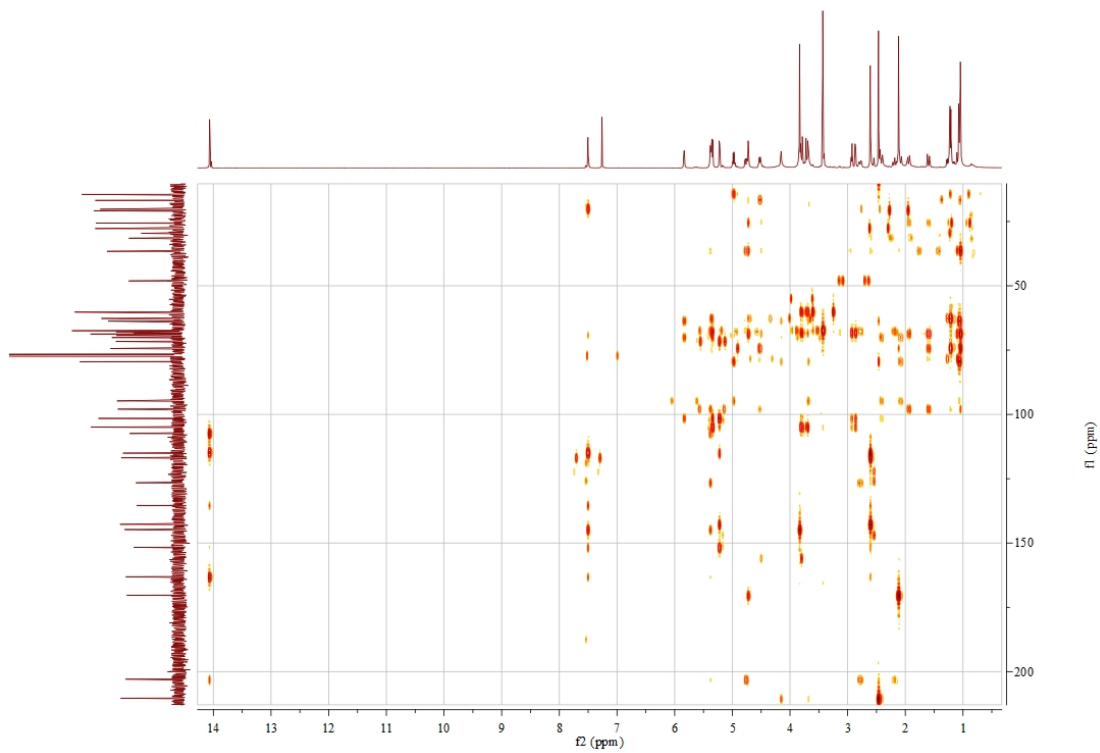

Fig. S38  $^1\text{H-NMR}$  spectrum of compound **15a** in  $\text{CDCl}_3$

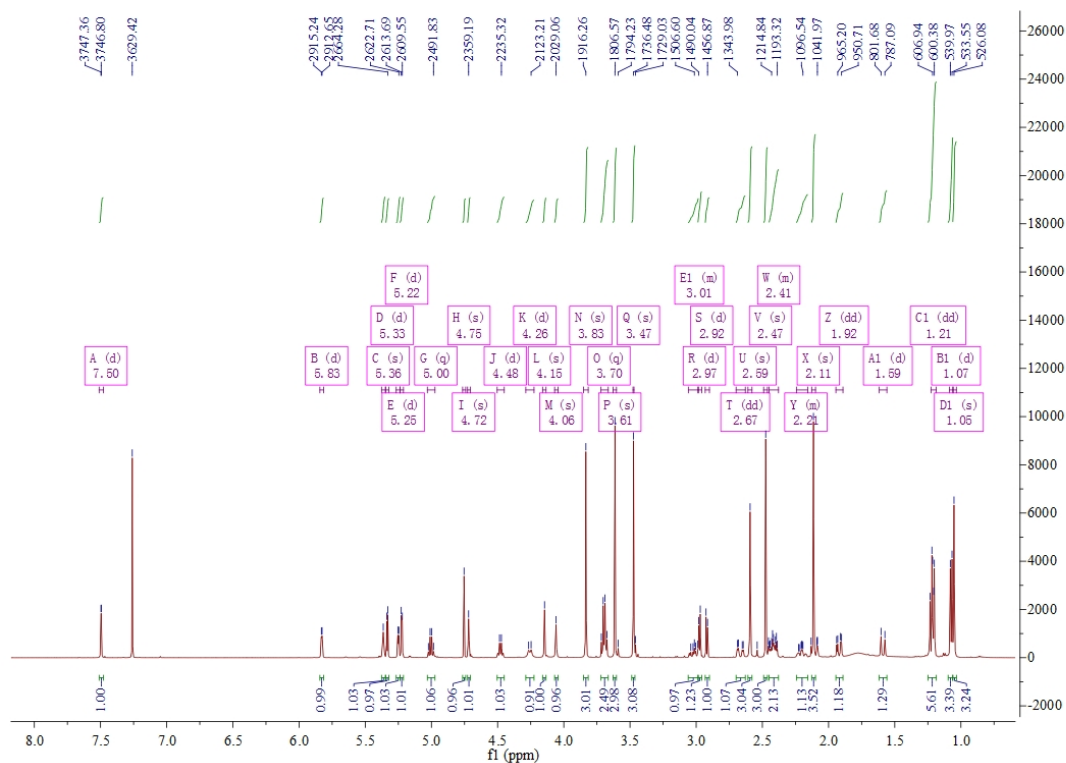

Fig. S39  $^{13}\text{C-NMR}$  spectrum of compound **15a** in  $\text{CDCl}_3$

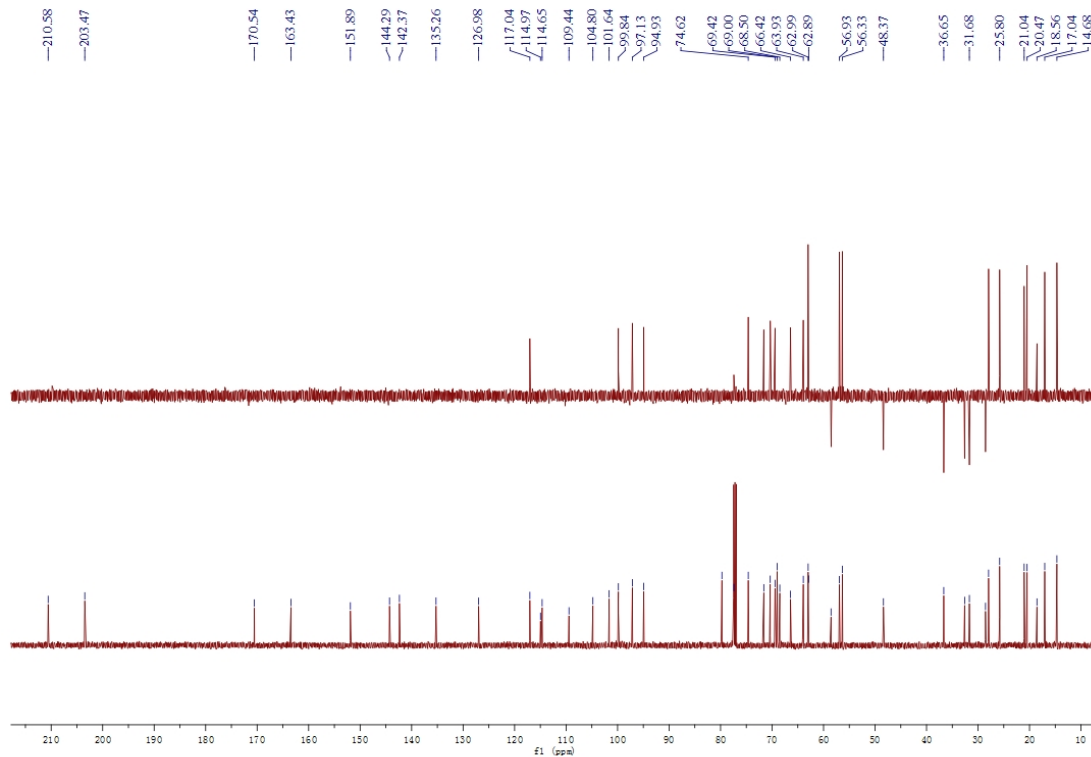

Fig. S40  $^1\text{H}$ - $^1\text{H}$  COSY spectrum of compound **15a** in  $\text{CDCl}_3$

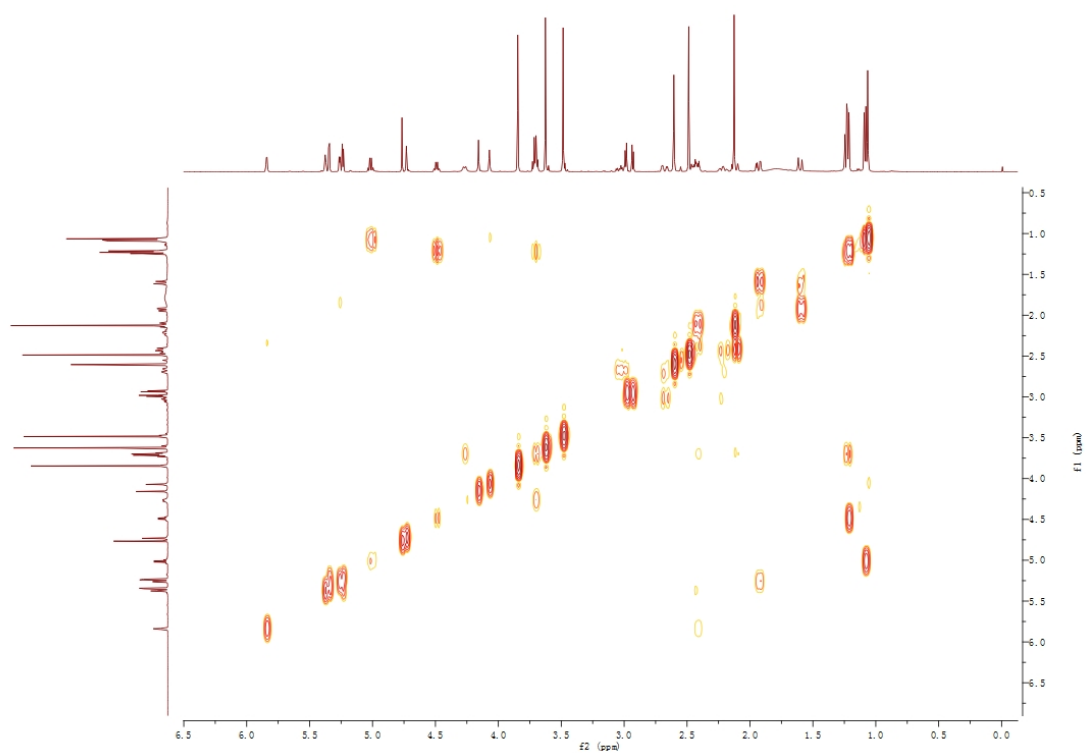

Fig. S41 HSQC NMR spectrum of compound **15a** in  $\text{CDCl}_3$

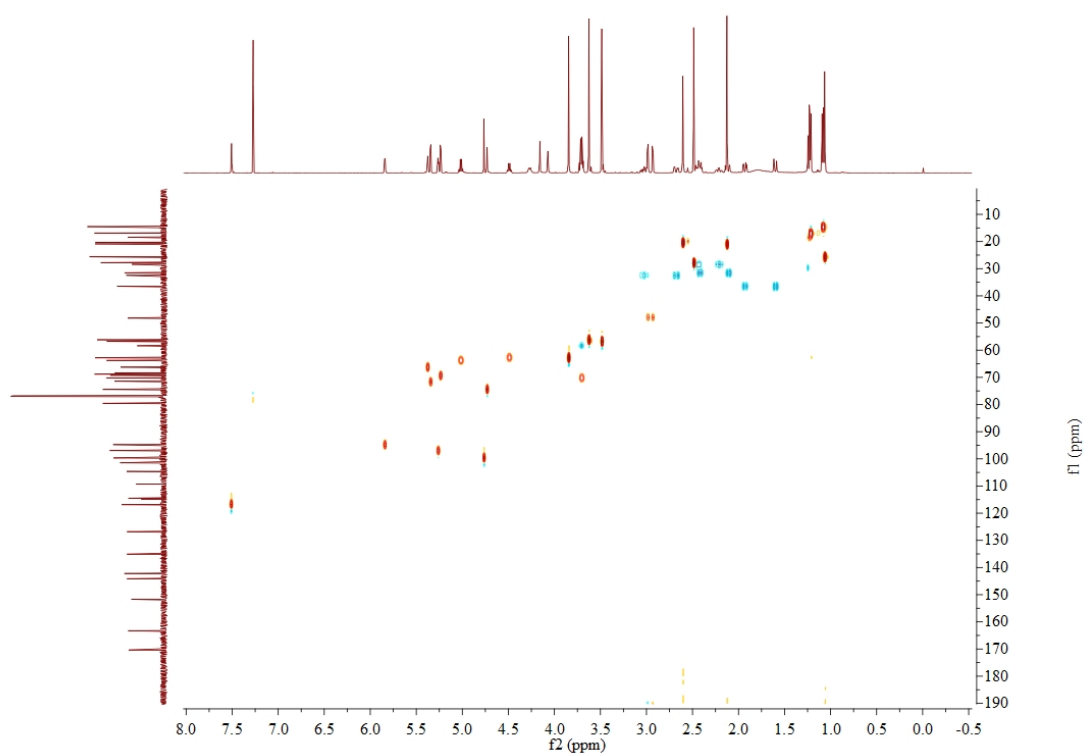

Fig. S42 HMBC NMR spectrum of compound **15a** in CDCl<sub>3</sub>

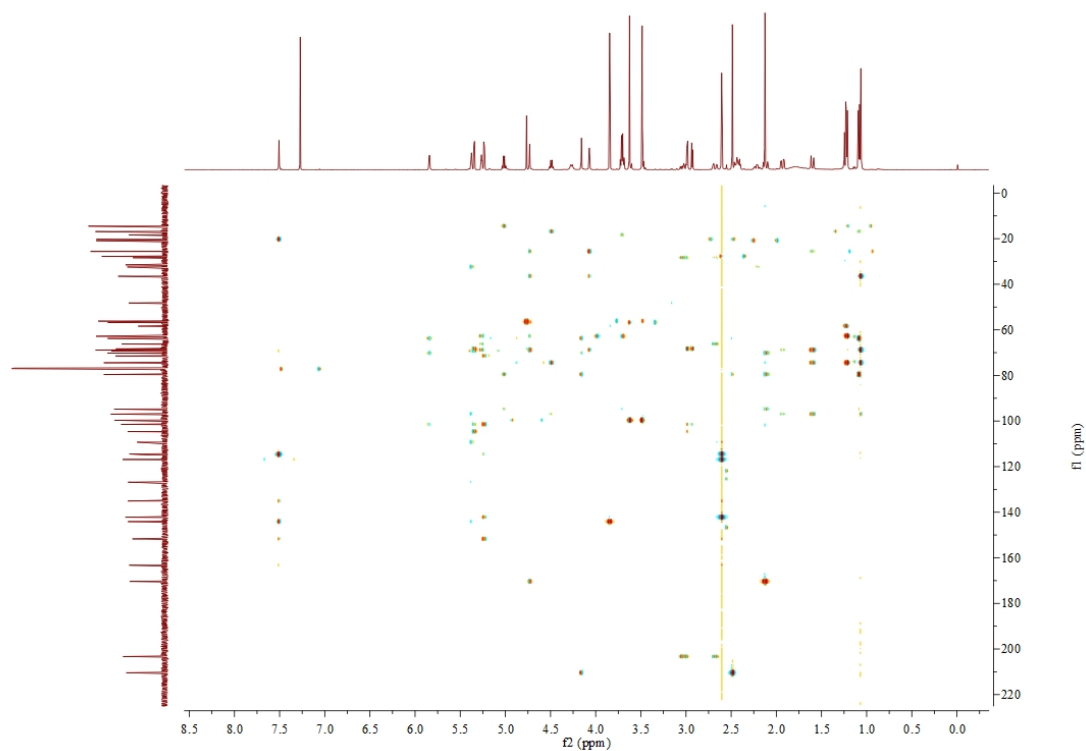

Fig. S43 <sup>1</sup>H-NMR spectrum of compound **15b** in CDCl<sub>3</sub>

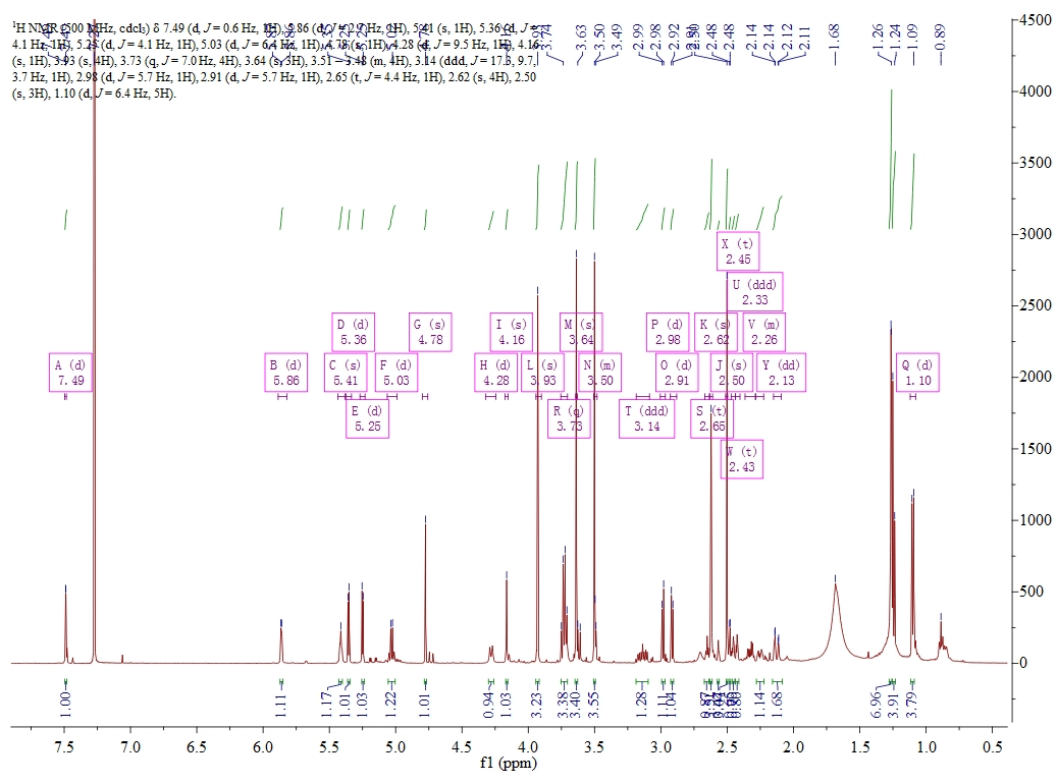

Fig. S44  $^{13}\text{C}$ -NMR spectrum of compound **15b** in  $\text{CDCl}_3$

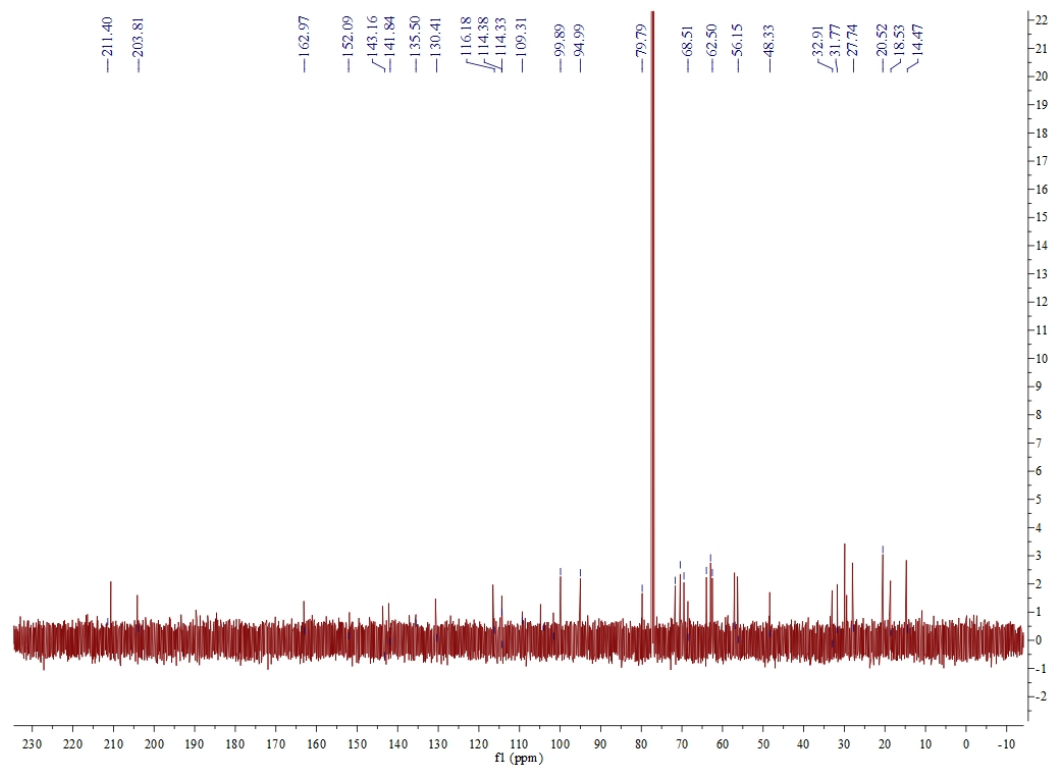

Fig. S45 Proposed pathway from intermediate **9** to **10**.

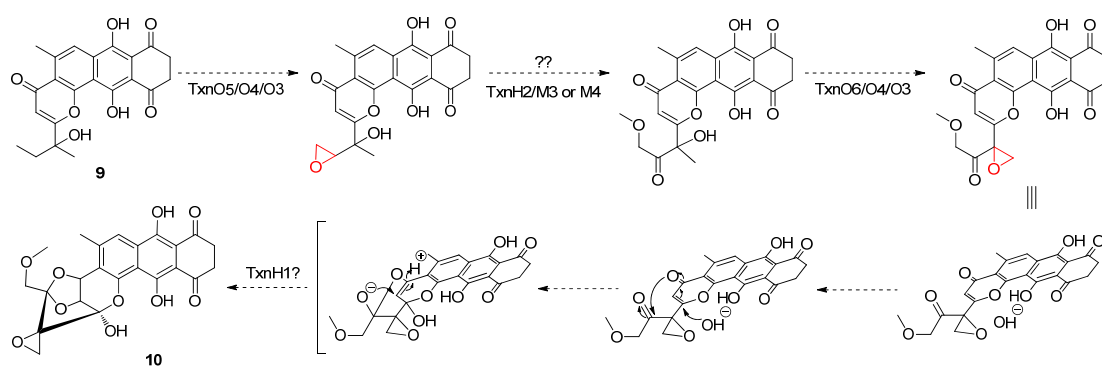

Supplement: SC-006-C5SC00116A-s001.pdf [file SC-006-C5SC00116A-s001.pdf]
